# Supplementary material for: Endothelial, epithelial, and fibroblast cells exhibit specific splicing programs independently of their tissue of origin
Source: HighWire-hosted journal article supplement (doi:10.1101/gr.162933.113), 2013-12-04
Supplement: FASTERDBsuppfigs.pdf [file FASTERDBsuppfigs.pdf]

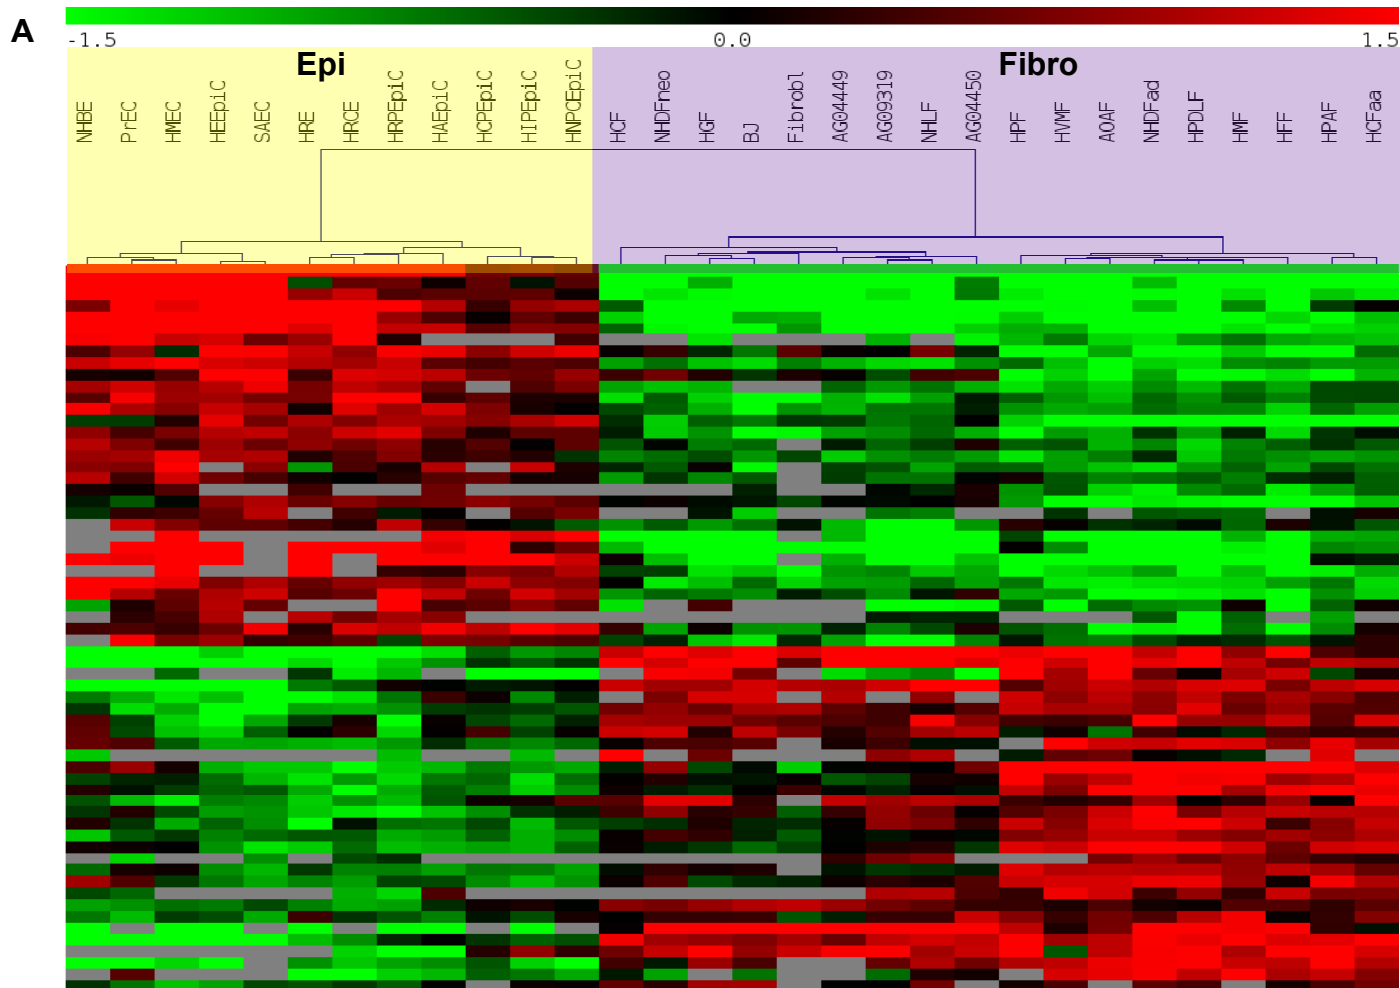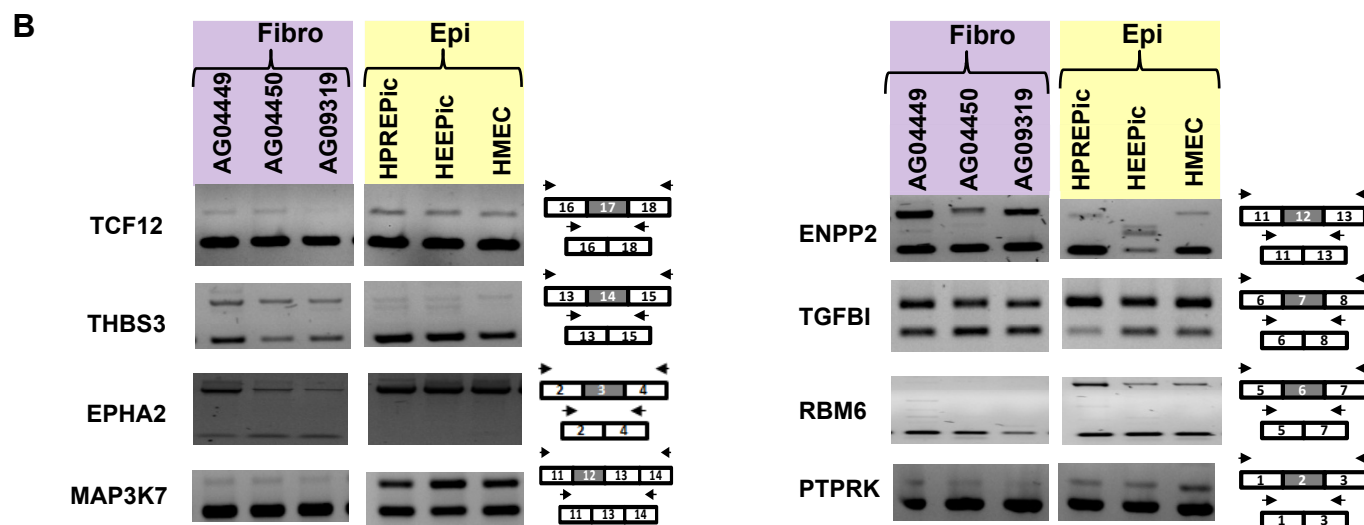

### Supplementary Figure S1.

**A.** HeatMap presentation of the Splicing Index (SI) values for exons differentially spliced when comparing fibroblast to epithelial cells. Each line corresponds to a regulated exon while each column corresponds to a specific cell. Green boxes ( $-1.5 < SI < 0$ ) correspond to low inclusion level in the cell compared to all the others; red boxes ( $0 < SI < 1.5$ ) to high inclusion level; black boxes ( $SI=0$ ) point no difference for exon inclusion between cells while grey boxes correspond to missing values. Exons were computationally split into several groups depending on their inclusion rate which correlate with the two major cell types.

(same as in Fig. 1B)

**B.** RT-PCR validations using RNAs from fibroblasts and epithelial cells, as indicated.



A

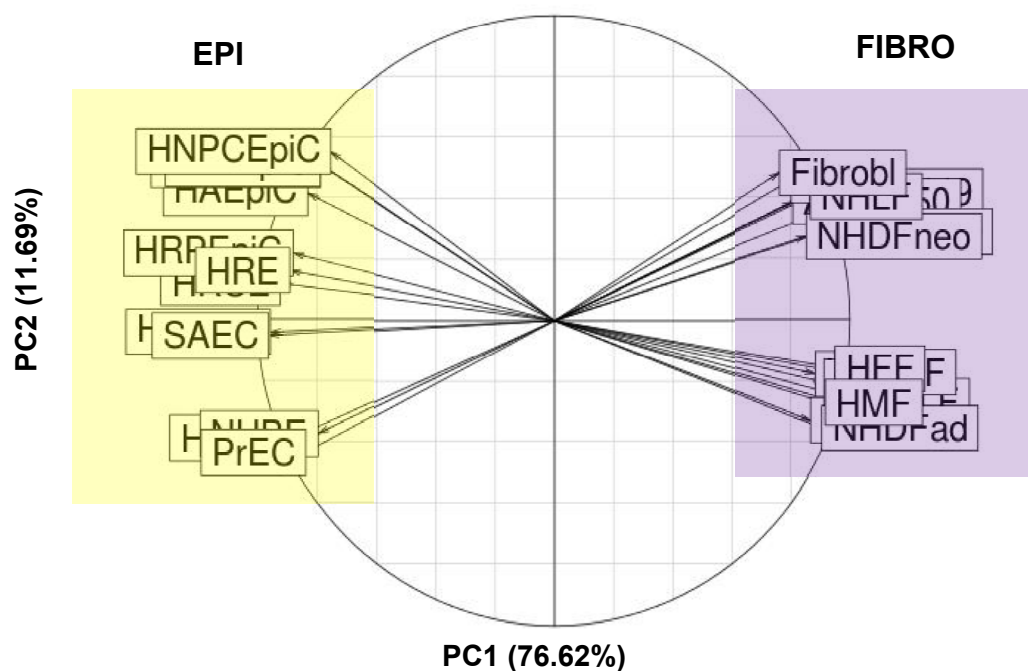

B

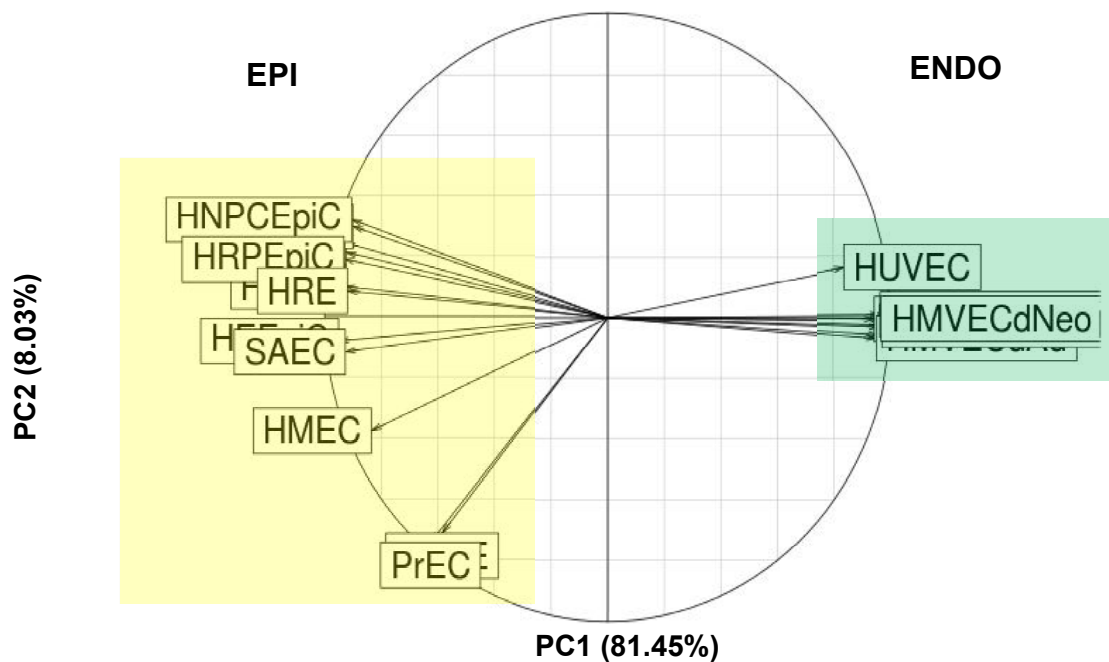

**Supplementary Figure S3:** Circles of correlations and arrows of the loadings of variables with principal components 1 and 2 for the fibroblastic vs. epithelial cell lines comparison (A) and the endothelial vs. epithelial comparison (B). The percentage of explained inertia by each component is also indicated for each of the three analyses. Epithelial cell lines are shown in yellow, endothelial in green and fibroblastic in purple. Principal component analysis was performed using the ade4 package of R (<http://pbil.univ-lyon1.fr/ade4/>).





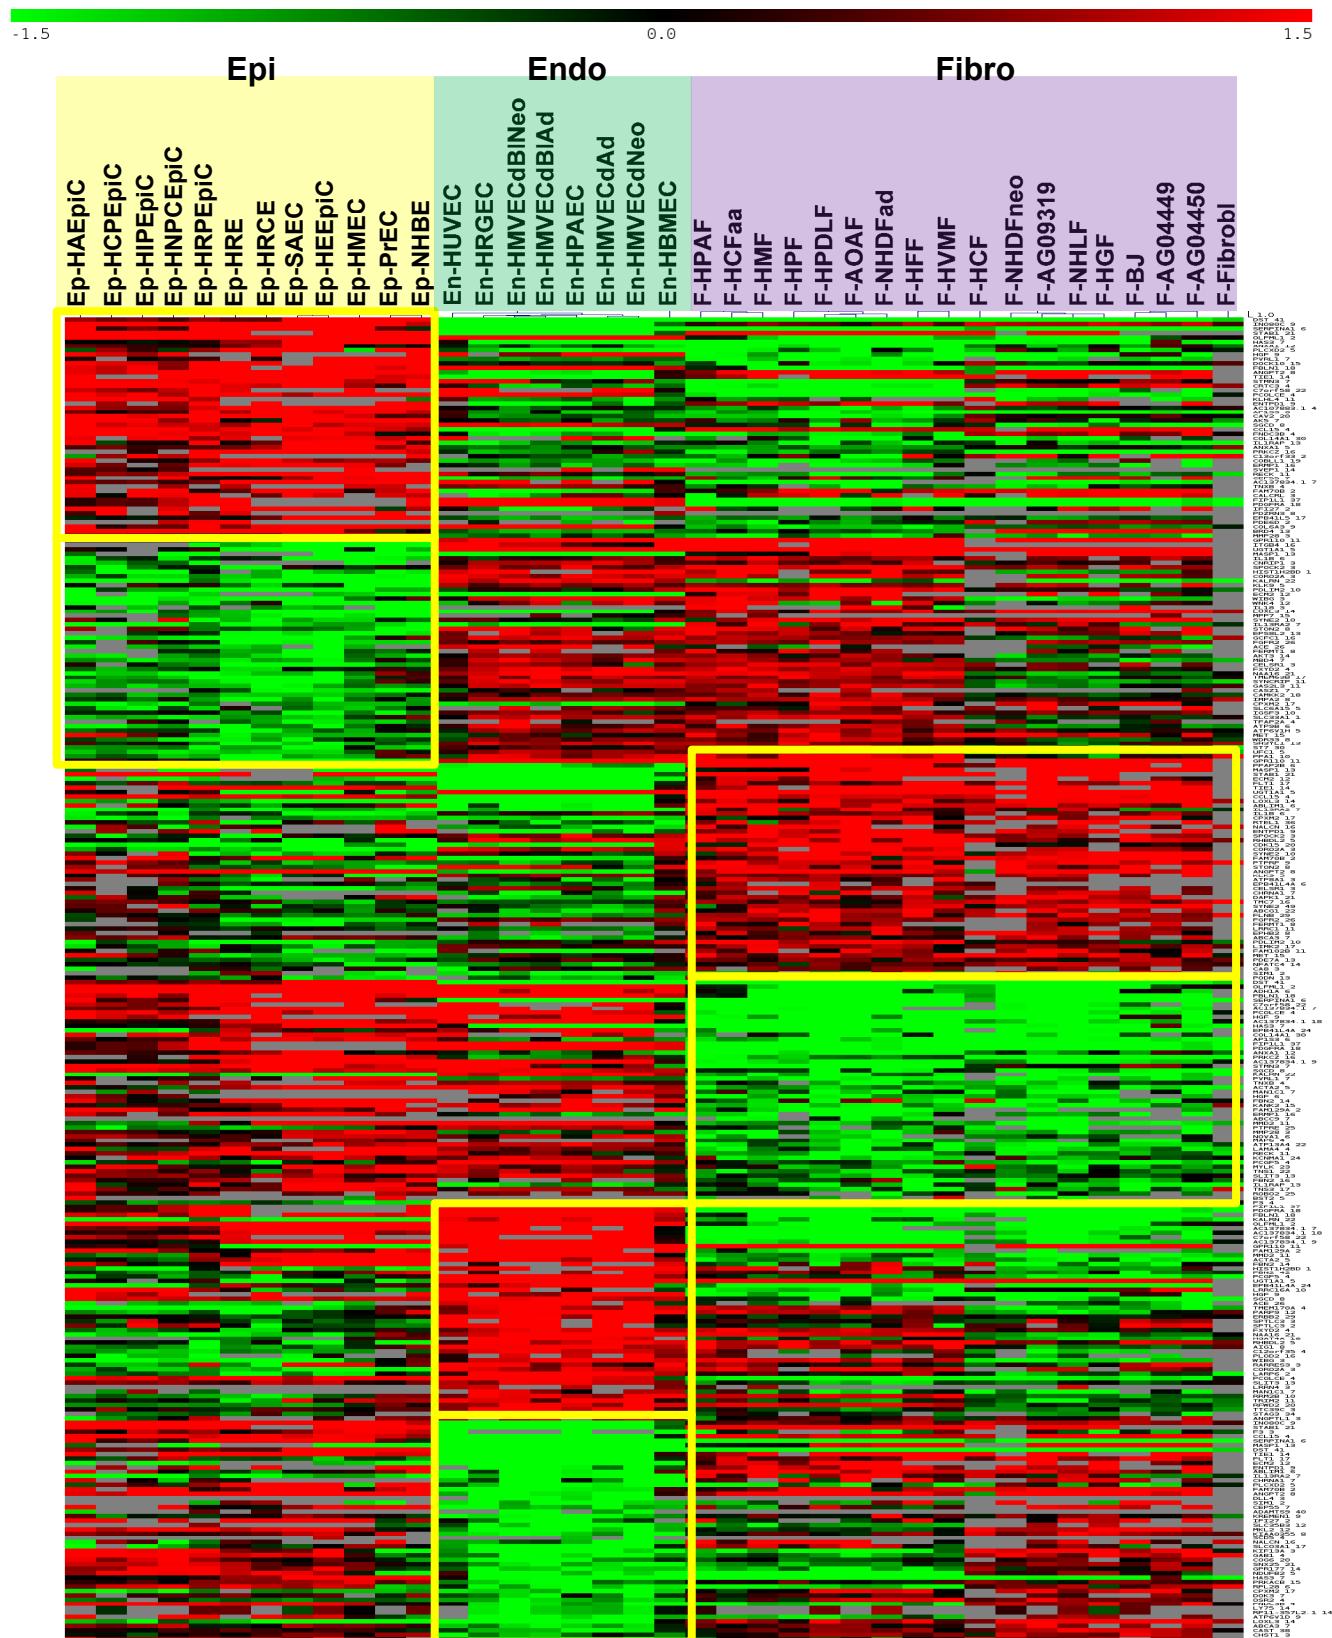

**Supplementary Figure S5:** HeatMap presentation of the Splicing Index (SI) values for Alternative Last Exons (ALE) differentially spliced across fibroblast, endothelial and epithelial cells. Exons were computationally split into several groups depending on their inclusion rate in the three major cell types (same as in Supplementary Fig. S4).

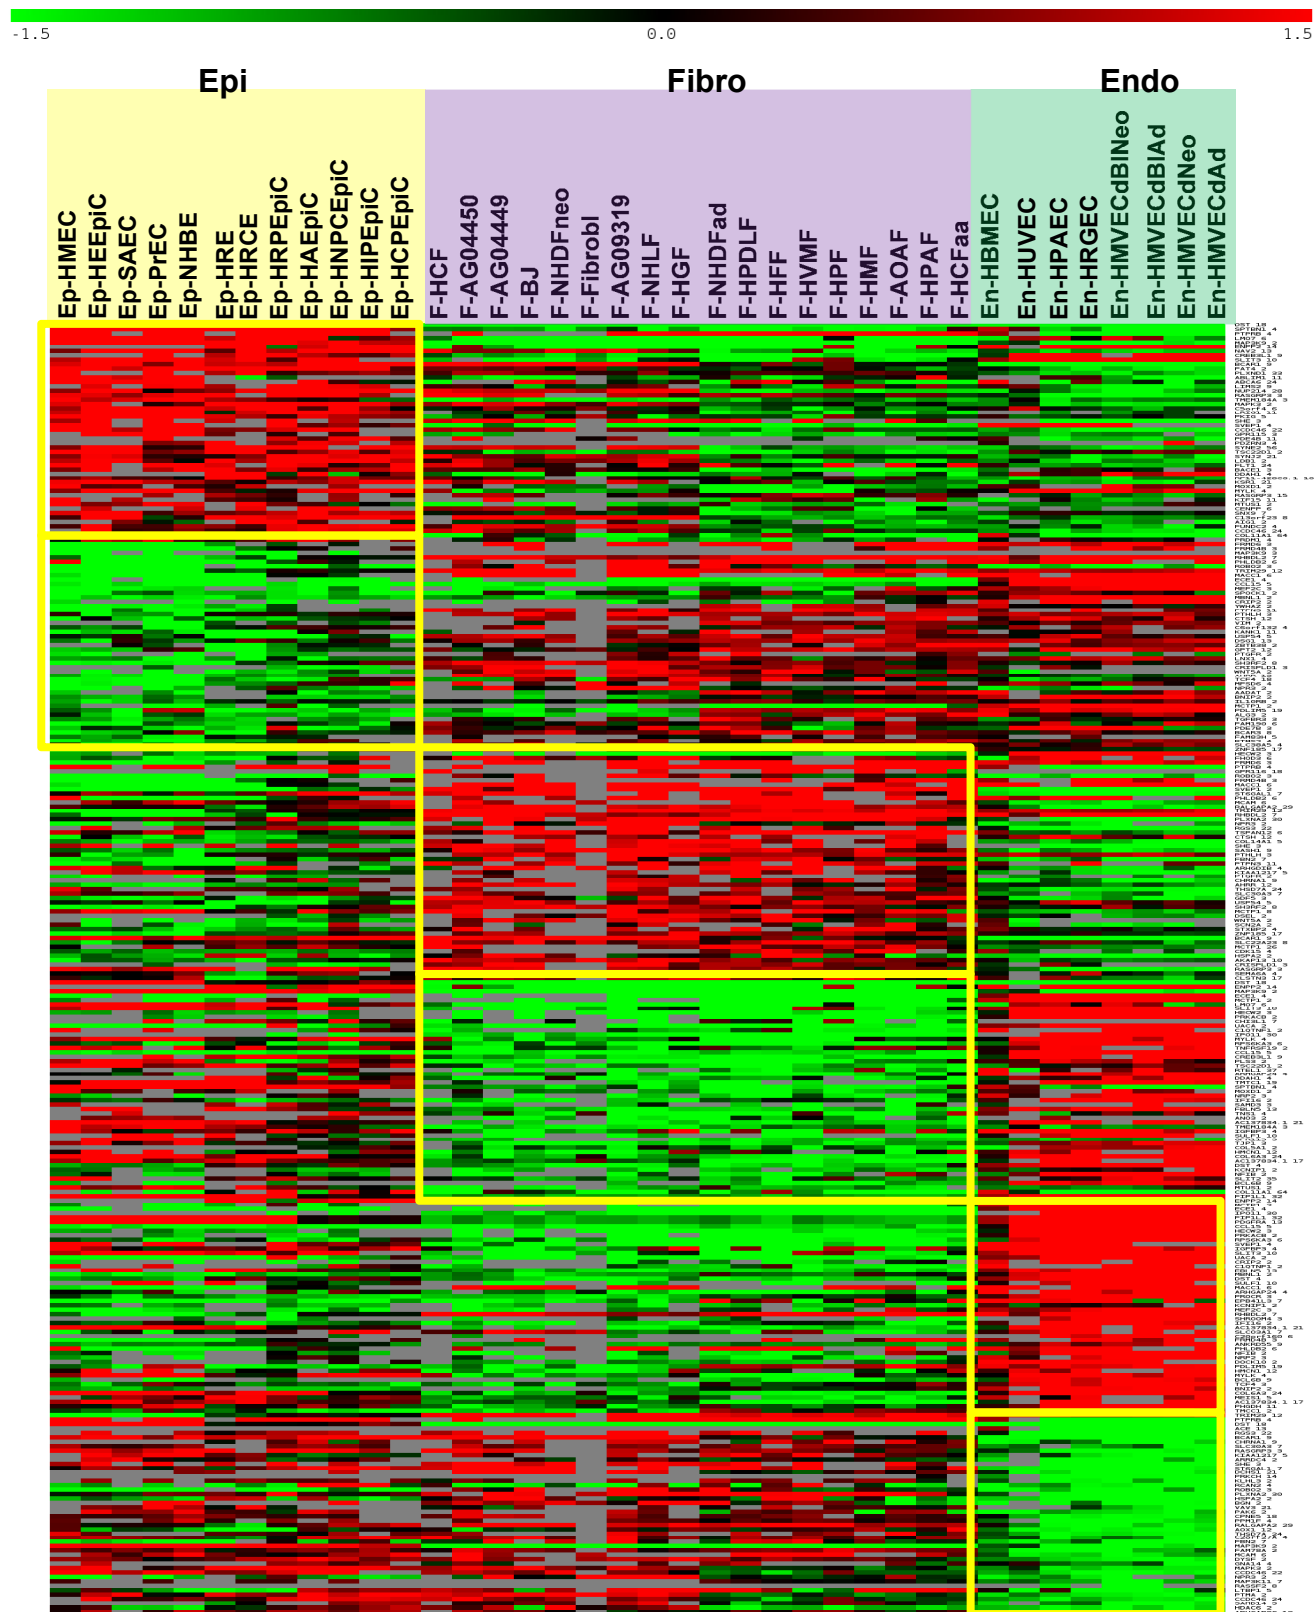

**Supplementary Figure S6:** HeatMap presentation of the Splicing Index (SI) values for Alternative First Exons (AFE) differentially spliced across fibroblast, endothelial and epithelial cells. Exons were computationally split into several groups depending on their inclusion rate in the three major cell types (same as in Supplementary Fig. S4).

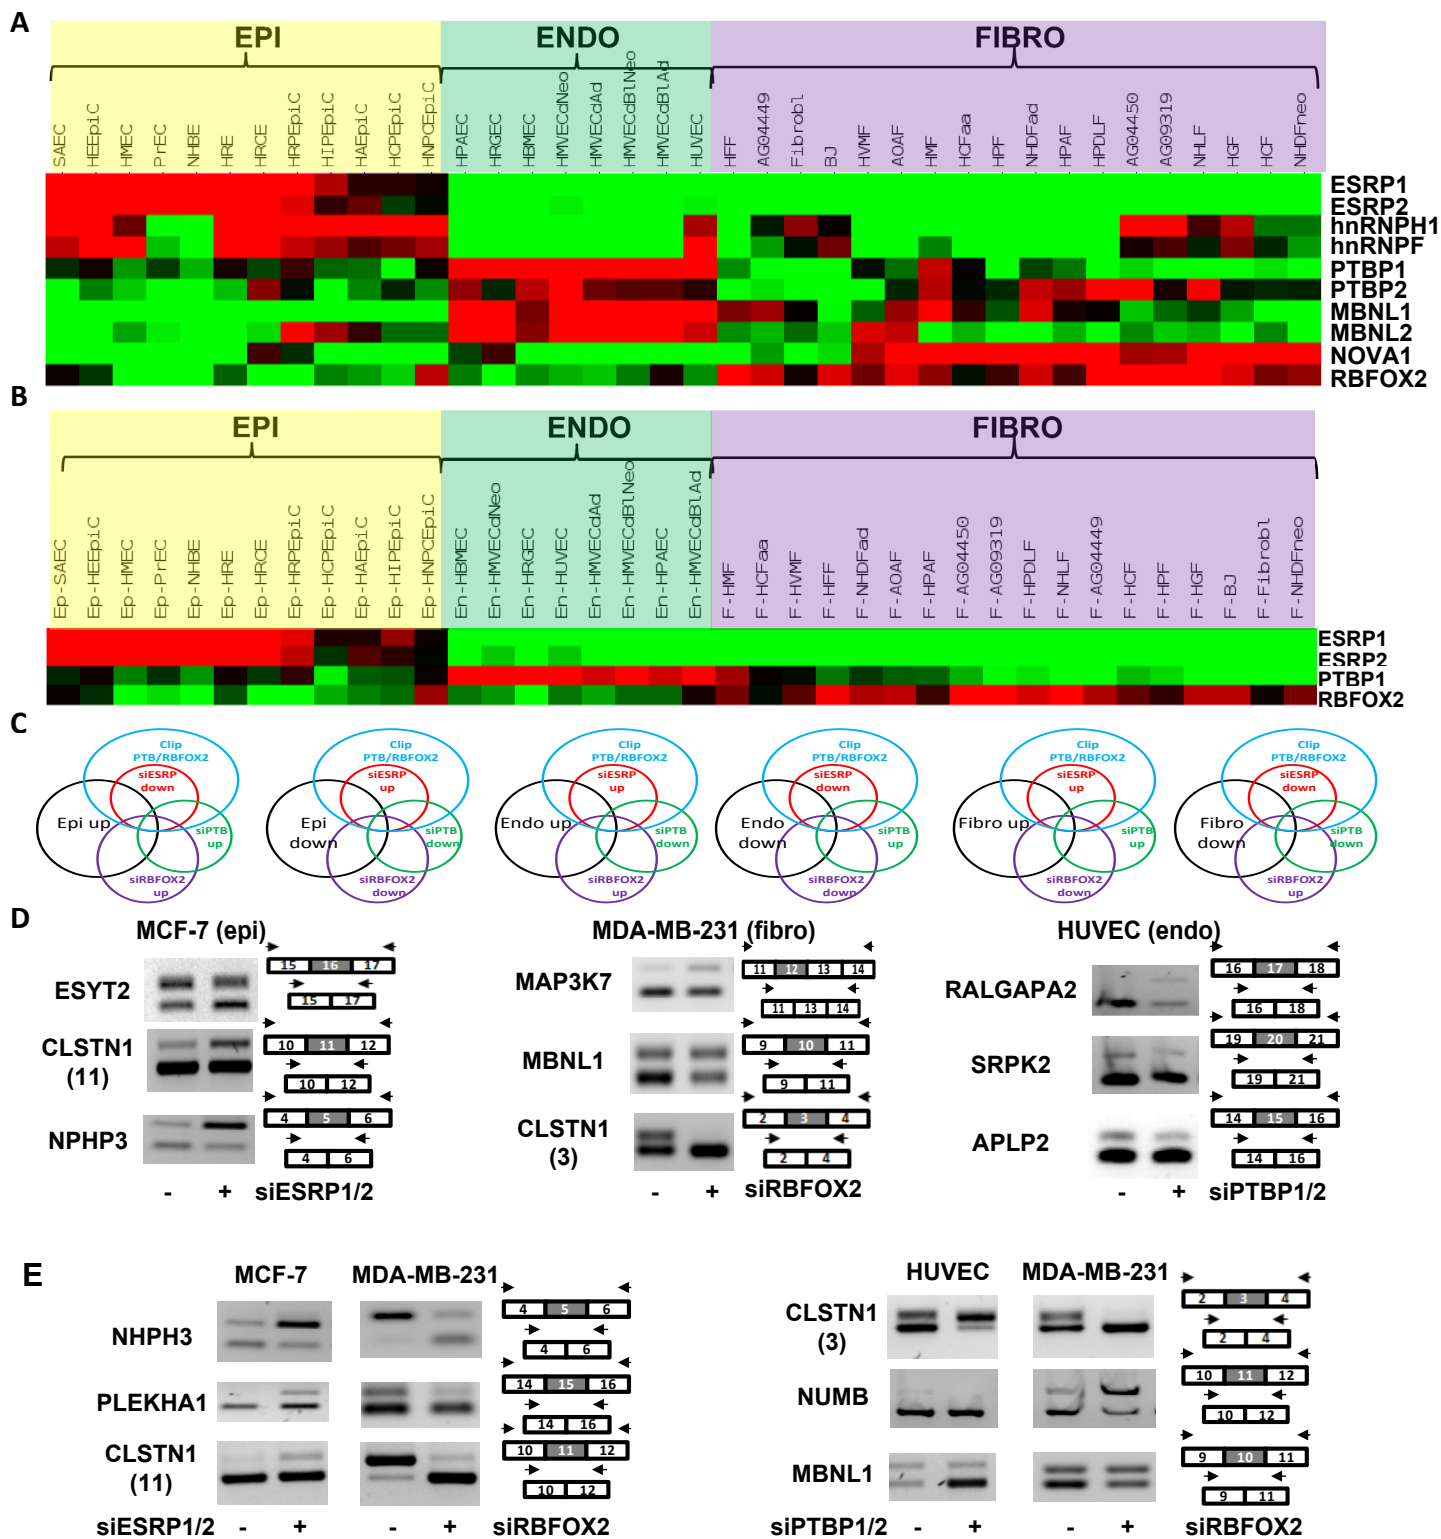

**Supplementary Figure S7.**

**A.** HeatMap of splicing factor expression level (same as Fig. 4A).

**B.** Same as above with a selection of splicing factors.

**C.** Strategy of splicing factor analyses. ASEs predicted to be regulated by a splicing factor using exon-array or RNA-seq datasets were compared to cell-type specific predicted ASEs. For each cell type, we paid attention to the ASE regulation sense. For example, in epithelial cells, as ESRP is up-regulated while PTB and RBFOX2 are down-regulated, an epithelial-included ASE is predicted to be regulated by one of these factors if it is skipped upon ESRP depletion or included by PTB or RBFOX2 depletion. To be considered as confident, CLIP-hits must be detected in the exon or within 100 nt upstream and downstream of the exon.

**D.** RT-PCR analysis of the effect of ESRP-, RBFOX2-, PTB-depletion on alternative splicing of selected genes in the MCF-7 epithelial cell line, MDA-MB-231 fibroblast-like cell line, and HUVEC endothelial cell, respectively.

**E.** Same as in D

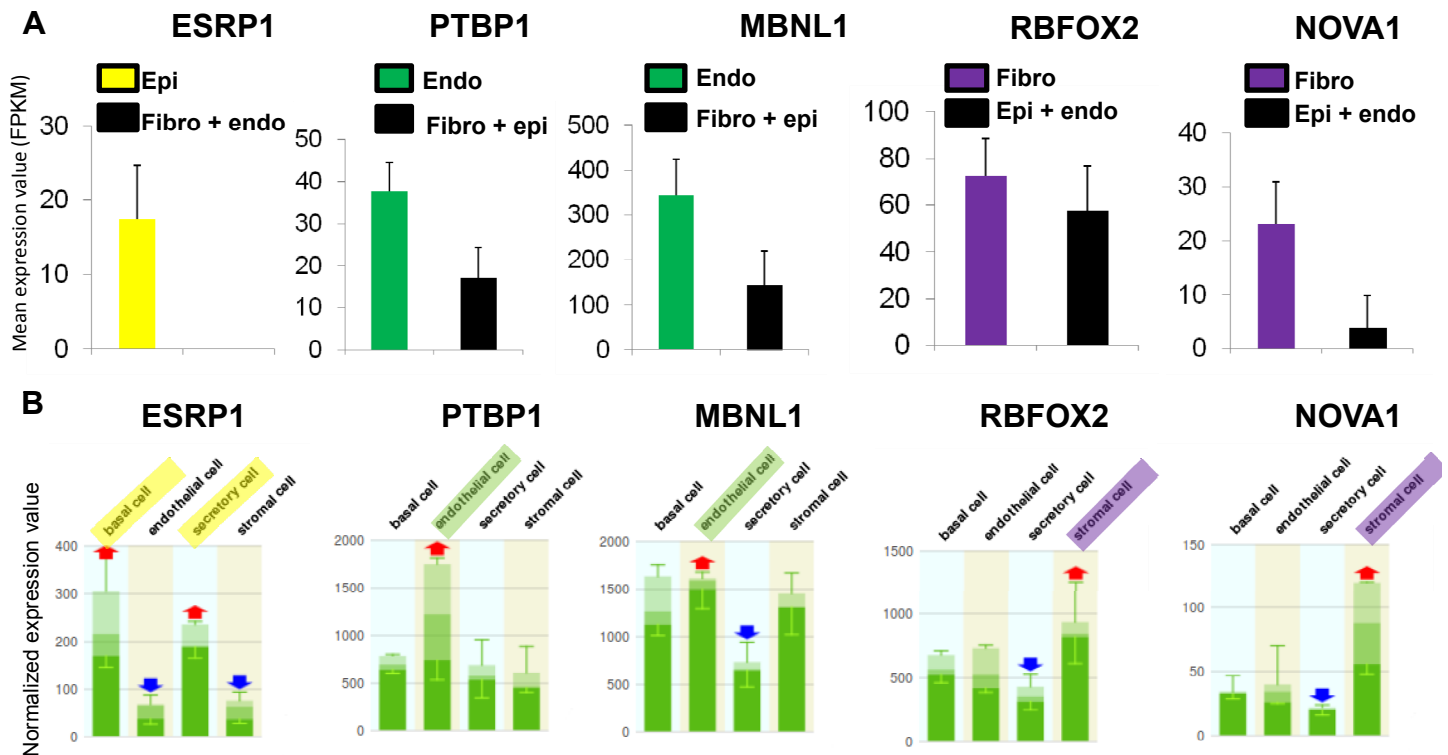

#### Supplementary Figure S8.

**A.** Samples corresponding to the normal cell lines available for the epithelial, endothelial and fibroblast categories were selected from total long, whole cell RNA-Seq samples of the ENCODE project (ENCODE Project Consortium, 2007, 2011) Tier 3, sequenced by the Cold Spring Harbor Laboratory. Endothelial cells are Haoec, Human Aortic Endothelial Cells (2 replicates) and Hsavec, Human Saphenous Vein Endothelial Cells (2 replicates); Epithelial cells are Hmepc, Mammary Epithelial Cells and Hpiepc, Human Placental Epithelial Cells amniotic membrane (2 replicates); Fibroblasts are Nhdf, Normal Human Dermal Fibroblasts from temple / breast (2 replicates) and Haoaf, Human Aortic Adventitial Fibroblasts (1 replicate). Read alignments for the different cell lines in bam format have been downloaded using the ENCODE project Data Coordination Centre, from the ENCODE RNA Dashboard ([http://genome.crg.es/encode\\_RNA\\_dashboard/](http://genome.crg.es/encode_RNA_dashboard/)). Cuffdiff, from the Cufflinks package (Trapnell et al. 2013) was used to analyse the gene expression, using the protocol described as “Differential analysis without gene and transcript discovery”. We kept the default parameters, except that we specified the RNA-Seq library type (--library-type fr-firststrand), following the recommendations provided by the STAR program (Dobin et al. 2013), which was used for the alignment. The gene annotation file in gtf format was by Illumina iGenomes, as suggested by the Cufflinks website. The mean value and standard deviation were computed for each gene of the FPKM (Fragments Per Kilobase of transcript per Million mapped reads) expression values obtained by each replicates in a category. The figure shows the mean expression value in FPKM of selected genes in the different cell types. These results confirm the expression pattern across endothelial, epithelial and fibroblast cells of the selected splicing factors obtained using Exon Array datasets (main manuscript Fig. 4A) or by RT-qPCR (main manuscript Fig. 4B).

**B.** The experiment E-GEOD-3998, which corresponds to a transcription profiling of four human prostate cell types (Oudes et al. 2006) was selected from the Gene Expression Atlas website (<http://www.ebi.ac.uk/gxa>; Kapushesky et al. 2012). Prostate basal and secretory cells are two epithelial cell types, and stromal cells are composed of fibroblasts and smooth muscle cells. The figure shows the expression value of selected genes in the different cell types, and the up and down arrows show respectively the up- and down-regulated genes. These results confirm the expression pattern across endothelial, epithelial and fibroblast cells of the selected splicing factors obtained using Exon Array datasets (main manuscript Fig. 4A) or by RT-qPCR (main manuscript Fig. 4B).

#### References:

- \_ENCODE Project Consortium, Birney E, Stamatoyannopoulos JA, Dutta A, Guigó R, Gingeras TR, Margulies EH, Weng Z, Snyder M, Dermitzakis ET, et al. 2007. Identification and analysis of functional elements in 1% of the human genome by the ENCODE pilot project. *Nature* **447**: 799-816.
- \_ENCODE Project Consortium. 2011. A user's guide to the encyclopedia of DNA elements (ENCODE). *PLoS Biol* **9**: e1001046.
- Trapnell C, Hendrickson DG, Sauvageau M, Goff L, Rinn JL, Pachter L. 2013. Differential analysis of gene regulation at transcript resolution with RNA-seq. *Nat Biotechnol* **31**: 46-53.
- \_Dobin A, Davis CA, Schlesinger F, Drenkow J, Zaleski C, Jha S, Batut P, Chaisson M, Gingeras TR. 2013. STAR: ultrafast universal RNA-seq aligner. *Bioinformatics* **29**: 15-21.
- \_Kapushesky M, Adamusiak T, Burdett T, Culhane A, Farne A, Filippov A, Holloway E, Klebanov A, Kryvych N, Kurbatova N, et al. 2012. Gene Expression Atlas update--a value-added database of microarray and sequencing-based functional genomics experiments. *Nucleic Acids Res* **40**:D1077-1081.
- \_Oudes AJ, Campbell DS, Sorensen CM, Walashek LS, True LD, Liu AY. 2006. Transcriptomes of human prostate cells. *BMC Genomics* **7**: 92.

## ESRP

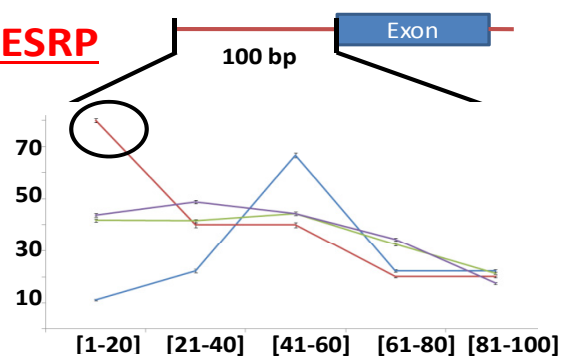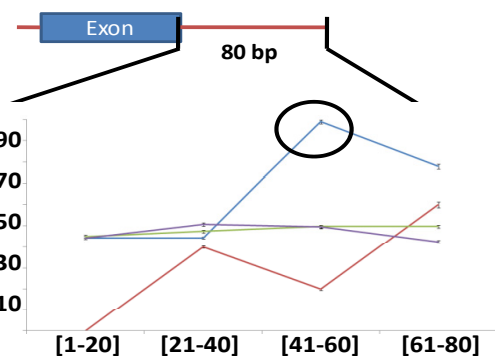

## RBFOX2

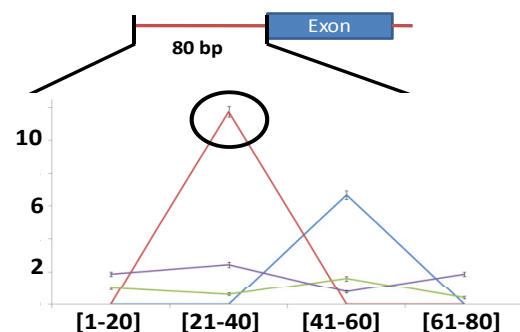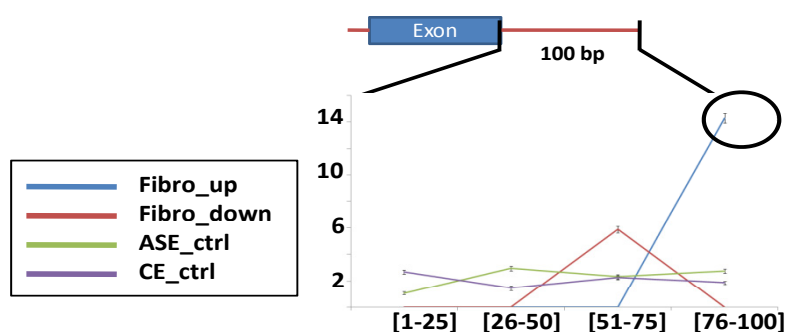

## PTB

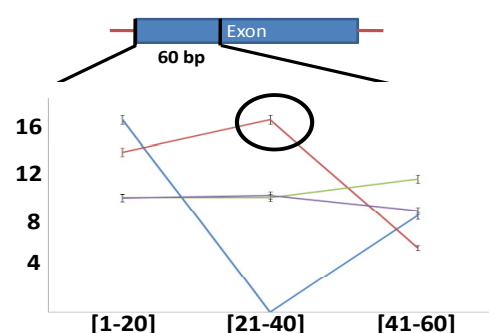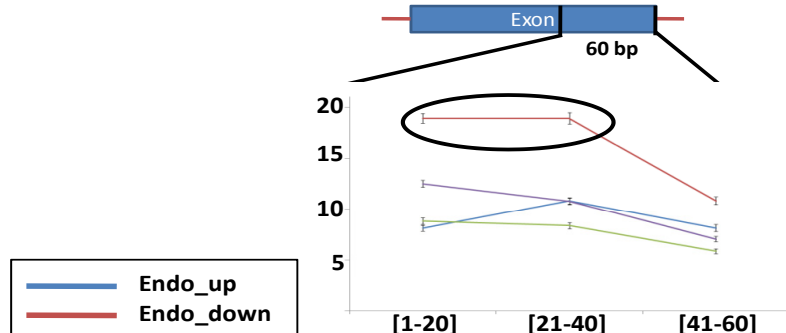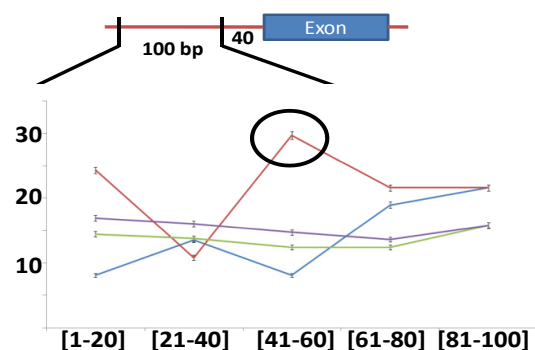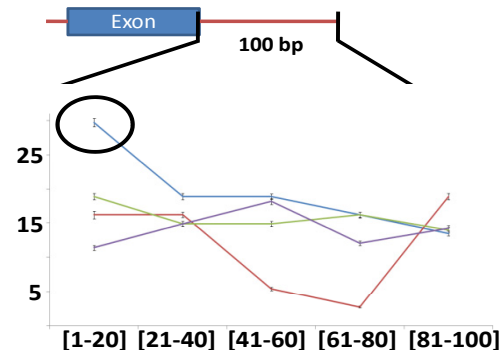

### Supplementary Figure S9.

Splicing factor binding sites were searched using PatSearch Tool on the genomic sequences using previously defined splicing factor binding motifs (see Supplementary Table S8). A set of 1000 randomly selected alternative exons and a set of 1000 randomly selected constitutive exons were used as controls. Four regions were defined: 100 nt upstream and downstream of the exon, the first 60 nts of the exon and the last 60 nts of the exon. For each region, a sliding window of a specific length was considered and the enrichment score of the splicing factor was computed at each position as :  $(\sum \text{number of factor motifs at position } X / \text{Total number of analyzed sequences}) * 100$ . The total number of binding sites found in each region of each exon group was used to compute the standard deviation value.

**A**

# FasterDB

Search for a gene:  Species:

2

ENAH  
FLJ10773, MENA, NDPP1  
ENSG00000154380  
enabled homolog (Drosophila)

**B**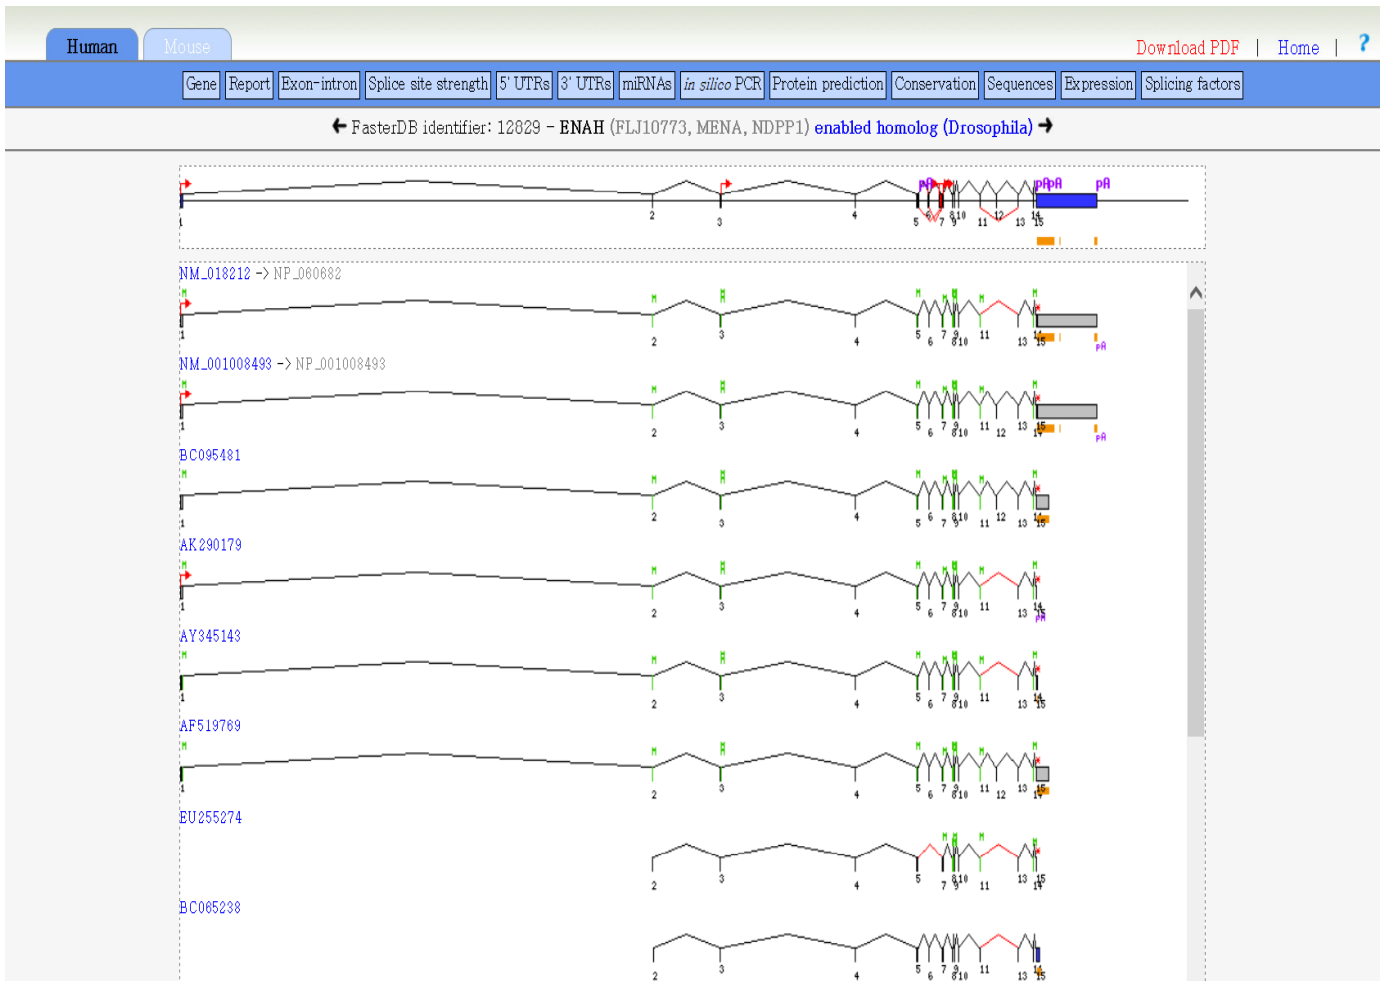

**Supplementary Figure S10.** FasterDB search and main pages corresponding to the human *ENAH* gene.

**A.** The search engine is based on keywords (e.g. Gene Symbol, ENSEMBL ID, HUGO gene name, etc.).

**B.** *ENAH* gene main page in FasterDB. Alternative splicing events are depicted by red broken lines, and microRNAs binding sites are depicted by orange under the gene structure. Known transcripts are schematically represented below the gene structure. Several buttons in the toolbar allow the user to get additional information (see below). The main page for the mouse orthologous gene can be displayed by clicking on the “Mouse” link.

**A**

|                                             | Gene                                                  |
|---------------------------------------------|------------------------------------------------------------------------------------------------------------------------------------------|
| <b>Symbol:</b>                              | <b>ENAH</b>                                                                                                                              |
| <b>Synonyms:</b>                            | FLJ10773, MENA, NDPP1                                                                                                                    |
| <b>Description:</b>                         | enabled homolog (Drosophila)                                                                                                             |
| <b>Ensembl link:</b>                        | <a href="#">ENSG00000154380</a>                                                                                                          |
| <b>Chromosome:</b>                          | 1 - Reverse Strand                                                                                                                       |
| <b>Chromosomal location:</b><br>(UCSC link) | <a href="#">225674534 - 225840845</a> (166312bp)                                                                                         |
| <b>Sequence:</b>                            | <a href="#">sequence</a>                                                                                                                 |
| <b>Associated transcripts:</b>              | NM_018212 NM_001008493 BC095481 AK290179 AY345143 AF519769<br>EU255274 BC065238 BC010414 AK096246 AK126894 AK127561 AK001635<br>AL133059 |

**B**

| Exon-Intron  |        |                  |                                     |        |                          |                          |
|-------------------------------------------------------------------------------------------------|--------|------------------|-------------------------------------|--------|--------------------------|--------------------------|
| Position                                                                                        | Type   | Gene coordinates | Chromosomal coordinates             | Length | Sequence                 | Features                 |
| 1                                                                                               | Exon   | 1 - 458          | <a href="#">225840388-225840845</a> | 458    | <a href="#">sequence</a> | <a href="#">download</a> |
| 1                                                                                               | Intron | 459 - 85729      | <a href="#">225755117-225840387</a> | 85271  | <a href="#">sequence</a> | -                        |
| 2                                                                                               | Exon   | 85730 - 85895    | <a href="#">225754951-225755116</a> | 166    | <a href="#">sequence</a> | <a href="#">download</a> |
| 2                                                                                               | Intron | 85896 - 98060    | <a href="#">225742786-225754950</a> | 12165  | <a href="#">sequence</a> | -                        |
| 3                                                                                               | Exon   | 98061 - 98238    | <a href="#">225742608-225742785</a> | 178    | <a href="#">sequence</a> | <a href="#">download</a> |
| 3                                                                                               | Intron | 98239 - 122505   | <a href="#">225718341-225742607</a> | 24267  | <a href="#">sequence</a> | -                        |
| 4                                                                                               | Exon   | 122506 - 122590  | <a href="#">225718256-225718340</a> | 85     | <a href="#">sequence</a> | <a href="#">download</a> |
| 4                                                                                               | Intron | 122591 - 133578  | <a href="#">225707268-225718255</a> | 10988  | <a href="#">sequence</a> | -                        |
| 5                                                                                               | Exon   | 133579 - 133946  | <a href="#">225706900-225707267</a> | 368    | <a href="#">sequence</a> | <a href="#">download</a> |
| 5                                                                                               | Intron | 133947 - 135837  | <a href="#">225705009-225706899</a> | 1891   | <a href="#">sequence</a> | -                        |
| 6                                                                                               | Exon   | 135838 - 135948  | <a href="#">225704898-225705008</a> | 111    | <a href="#">sequence</a> | <a href="#">download</a> |
| 6                                                                                               | Intron | 135949 - 138243  | <a href="#">225702603-225704897</a> | 2295   | <a href="#">sequence</a> | -                        |
| 7                                                                                               | Exon   | 138244 - 138548  | <a href="#">225702298-225702602</a> | 305    | <a href="#">sequence</a> | <a href="#">download</a> |
| 7                                                                                               | Intron | 138549 - 140127  | <a href="#">225700719-225702297</a> | 1579   | <a href="#">sequence</a> | -                        |
| 8                                                                                               | Exon   | 140128 - 140273  | <a href="#">225700573-225700718</a> | 146    | <a href="#">sequence</a> | <a href="#">download</a> |
| 8                                                                                               | Intron | 140274 - 140429  | <a href="#">225700417-225700572</a> | 156    | <a href="#">sequence</a> | -                        |
| 9                                                                                               | Exon   | 140430 - 140487  | <a href="#">225700359-225700416</a> | 58     | <a href="#">sequence</a> | <a href="#">download</a> |
| 9                                                                                               | Intron | 140488 - 141284  | <a href="#">225699562-225700358</a> | 797    | <a href="#">sequence</a> | -                        |
| 10                                                                                              | Exon   | 141285 - 141333  | <a href="#">225699513-225699561</a> | 49     | <a href="#">sequence</a> | <a href="#">download</a> |
| 10                                                                                              | Intron | 141334 - 145126  | <a href="#">225695720-225699512</a> | 3793   | <a href="#">sequence</a> | -                        |
| 11                                                                                              | Exon   | 145127 - 145193  | <a href="#">225695653-225695719</a> | 67     | <a href="#">sequence</a> | <a href="#">download</a> |
| 11                                                                                              | Intron | 145194 - 148090  | <a href="#">225692756-225695652</a> | 2897   | <a href="#">sequence</a> | -                        |
| 12                                                                                              | Exon   | 148091 - 148153  | <a href="#">225692693-225692755</a> | 63     | <a href="#">sequence</a> | <a href="#">download</a> |
| 12                                                                                              | Intron | 148154 - 152073  | <a href="#">225688773-225692692</a> | 3920   | <a href="#">sequence</a> | -                        |
| 13                                                                                              | Exon   | 152074 - 152152  | <a href="#">225688694-225688772</a> | 79     | <a href="#">sequence</a> | <a href="#">download</a> |
| 13                                                                                              | Intron | 152153 - 154739  | <a href="#">225686107-225688693</a> | 2587   | <a href="#">sequence</a> | -                        |
| 14                                                                                              | Exon   | 154740 - 154797  | <a href="#">225686049-225686106</a> | 58     | <a href="#">sequence</a> | <a href="#">download</a> |
| 14                                                                                              | Intron | 154798 - 155331  | <a href="#">225685515-225686048</a> | 534    | <a href="#">sequence</a> | -                        |
| 15                                                                                              | Exon   | 155332 - 166312  | <a href="#">225674534-225685514</a> | 10981  | <a href="#">sequence</a> | <a href="#">download</a> |

**Supplementary Figure S11.** Gene (A) and Exon-Intron (B) tables. **A-** The gene table shows general information about the selected gene (official symbol, synonyms, description, chromosomal location and associated transcripts). Links to other resources are also available: clicking on the Ensembl ID of the gene leads to Ensembl while clicking on chromosomal coordinates directs to the UCSC page of the gene. Finally, clicking on sequence displays the sequences of each of the exons and introns of the gene. **B-** Summary table of the exon/intron structure of the gene. For each element, gene and chromosomal coordinates are displayed as well as its length. Clicking on sequence link displays the nucleotidic sequence of the element. For exons only, clicking on download link in the features column results in a file containing further information about the exon of interest.



**A**

| Report                                   |                                  |
|------------------------------------------|----------------------------------|
| Exon                                     | Number of supporting transcripts |
| Transcription initiation & first exon(s) |                                  |
| 1                                        | 2                                |
| 3                                        | 1                                |
| 6                                        | 1                                |
| 7                                        | 2                                |
| Transcription termination & last exon(s) |                                  |
| 5                                        | 1                                |
| 15                                       | 6                                |
| Exon skipping                            |                                  |
| 6                                        | 1                                |
| 12                                       | 9                                |
| Alternative 3' splice sites              |                                  |
| 7                                        | 1                                |
| Alternative 5' splice sites              |                                  |
| 6                                        | 1                                |

**B**

| Polyadenylation |          |                                   |                                          |                        |            |                              |             |
|-----------------|----------|-----------------------------------|------------------------------------------|------------------------|------------|------------------------------|-------------|
| Identifier      | Position | Gene coordinates of cleavage site | Chromosomal coordinates of cleavage site | Pattern                | PolyA tail | Accession number             | Type        |
| PA1             | 5        | 134098                            | <a href="#">225706748</a>                | <a href="#">AATAAA</a> | yes        | <a href="#">BC010414</a>     | Cdna        |
| PA2             | 15       | 155383                            | <a href="#">225685463</a>                |                        | no         | <a href="#">AK290179</a>     | Full_length |
| PA3             | 15       | 157666                            | <a href="#">225683180</a>                |                        | no         | <a href="#">AK096246</a>     | Full_length |
| PA4             | 15       | 157666                            | <a href="#">225683180</a>                |                        | no         | <a href="#">AK126894</a>     | Full_length |
| PA5             | 15       | 157666                            | <a href="#">225683180</a>                |                        | no         | <a href="#">AK001635</a>     | Full_length |
| PA6             | 15       | 166312                            | <a href="#">225674534</a>                | <a href="#">AATAAA</a> | no         | <a href="#">NM_018212</a>    | Cdna        |
| PA7             | 15       | 166312                            | <a href="#">225674534</a>                | <a href="#">AATAAA</a> | no         | <a href="#">NM_001008493</a> | Cdna        |

**C**

| Exon skipping |          |                           |
|---------------|----------|---------------------------|
| Identifier    | Position | Transcript                |
| ES1           | 6        | <a href="#">EU255274</a>  |
| ES2           | 12       | <a href="#">NM_018212</a> |
|               |          | <a href="#">AK290179</a>  |
|               |          | <a href="#">AY345143</a>  |
|               |          | <a href="#">EU255274</a>  |
|               |          | <a href="#">BC065238</a>  |
|               |          | <a href="#">AK096246</a>  |
|               |          | <a href="#">AK126894</a>  |
|               |          | <a href="#">AK001635</a>  |
|               |          | <a href="#">AL133059</a>  |

**Supplementary Figure S12.** Report (A), polyadenylation (B) and Exon skipping (C) tables. **A-** Features relative to alternative splicing events are summarized in the report table. For each type of event, the exon concerned and the number of transcripts having this event (number of supporting transcripts) are displayed. Clicking on a given event displays further information about it. Two examples of transcription end and exon skipping events tables are shown in **B** and **C** respectively. **B-** The “Transcription termination & last exon(s)” link shows polyadenylation sites. For each polyadenylation site, we display its exonic position, gene and chromosomal coordinates. Moreover information about the signal pattern, the accession number and the type of sequence (cDNA/Est) of the transcript used to define the polyadenylation site are displayed. Finally, the presence of a polyA tail is tested and notified when present in the sequence. **C-** The “Exon Skipping” table shows information about skipped exons displaying their position and the transcripts that have been used to make this annotation.



| Splice site strength |               |      |          |             |                         |
|----------------------|---------------|------|----------|-------------|-------------------------|
| Identifier           | Site          | Exon | Strength | Alternative | Sequence                |
| S1                   | 5' (donor)    | 1    | 8.41     | no          | GAGgtgagg               |
| S2                   | 5' (donor)    | 2    | 11.08    | no          | CAGgtaagg               |
| S3                   | 3' (acceptor) | 2    | 8.59     | no          | tttttttttttttacagTGA    |
| S4                   | 5' (donor)    | 3    | 11.08    | no          | CAGgtaagg               |
| S5                   | 3' (acceptor) | 3    | 6.9      | no          | aaagaattatttttttagGTC   |
| S6                   | 5' (donor)    | 4    | 8.88     | no          | AAGgtaa                 |
| S7                   | 3' (acceptor) | 4    | 11.04    | no          | aatgtttctcctctgtagGGC   |
| S8                   | 5' (donor)    | 5    | 9.45     | no          | CTGgtaaga               |
| S9                   | 3' (acceptor) | 5    | 11.06    | no          | ttttttttttttccagACA     |
| S10                  | 5' (donor)    | 6    | 9.16     | no          | AGGgtaagg               |
| S11                  | 3' (acceptor) | 6    | 12.94    | no          | tctcccttccctctgcagCTG   |
| S12                  | 5' (donor)    | 6    | -31.91   | yes         | CTCctctaa               |
| S13                  | 5' (donor)    | 7    | 6.15     | no          | CGGgtaa                 |
| S14                  | 3' (acceptor) | 7    | 10.84    | no          | ttacatttctctctcagGCA    |
| S15                  | 3' (acceptor) | 7    | -5.83    | yes         | accgccccctctccccctcCTC  |
| S16                  | 5' (donor)    | 8    | 10.28    | no          | GAGgtaagg               |
| S17                  | 3' (acceptor) | 8    | 4.63     | no          | gtctgtatattctcattaagATG |
| S18                  | 5' (donor)    | 9    | 8.07     | no          | GGTgtaagt               |
| S19                  | 3' (acceptor) | 9    | 7.13     | no          | cggatttgcctctttgtagGAG  |
| S20                  | 5' (donor)    | 10   | 10.65    | no          | CTGgtaagt               |
| S21                  | 3' (acceptor) | 10   | 7.02     | no          | atatatatctgtatatttagGAA |
| S22                  | 5' (donor)    | 11   | 7.33     | no          | CAGgtatca               |
| S23                  | 3' (acceptor) | 11   | 6.54     | no          | tttgttttttttttaagAAC    |
| S24                  | 5' (donor)    | 12   | 7.33     | no          | CAGgtatca               |
| S25                  | 3' (acceptor) | 12   | 8.22     | no          | aatggtttccccttcacagACG  |
| S26                  | 5' (donor)    | 13   | 8.56     | no          | CAGgtgggt               |
| S27                  | 3' (acceptor) | 13   | 4.74     | no          | tggaaatctcatttatacagACC |
| S28                  | 5' (donor)    | 14   | 11.01    | no          | ATGgtaagt               |
| S29                  | 3' (acceptor) | 14   | 10.55    | no          | attttctctaataatttagGAC  |
| S30                  | 3' (acceptor) | 15   | 8.11     | no          | actgttctttccatccagCAA   |

**Supplementary Figure S13.** Splice site strength table. All the splice sites of the *ENAH* gene are showed in this table. For each splice site, we display its type (donor or acceptor), its strength according to MaxEntScan computation method and if the site is alternative or not. Furthermore, the sequence (9 and 23 nucleotides for donor and acceptor sites respectively) is showed with capital letters corresponding to the exonic part of the site while intronic part is represented in lowercase letters.

**A**

|                                          | 5' untranslated regions                                       |          |          |          |          |
|------------------------------------------|---------------------------------------------------------------|----------|----------|----------|----------|
|                                          | UTR 1                                                         | UTR 2    | UTR 3    | UTR 4    | UTR 5    |
| Supporting GenBank accession identifiers | NM_018212<br>NM_001008493<br>BC095481<br>AY345143<br>AF519769 | AK290179 | EU255274 | AK127561 | AK126894 |
| Length                                   | 453                                                           | 397      | 1029     | 727      | 353      |
| Number of ATGs in frame                  | 1                                                             | 1        | 4        | 1        | 1        |
| Number total of ATGs                     | 1                                                             | 1        | 14       | 10       | 2        |
| Number of GTGs in frame                  | 3                                                             | 1        | 12       | 3        | 2        |
| Number total of GTGs                     | 10                                                            | 8        | 24       | 13       | 13       |
| Number of CTGs in frame                  | 1                                                             | 1        | 7        | 0        | 2        |
| Number total of CTGs                     | 5                                                             | 5        | 14       | 2        | 5        |
| Number of micro ORFs in frame            | 1                                                             | 1        | 1        | 1        | 1        |
| Number total of micro ORFs               | 1                                                             | 1        | 1        | 7        | 1        |
| GC percentage                            | 76                                                            | 76       | 54       | 42       | 58       |
| Number of pyrimidine tracks              | 5                                                             | 4        | 6        | 10       | 9        |

**B**

|                                          | 3' untranslated regions                                                                                                               |
|------------------------------------------|---------------------------------------------------------------------------------------------------------------------------------------|
|                                          | UTR 1                                                                                                                                 |
| Supporting GenBank accession identifiers | NM_018212<br>NM_001008493<br>AL133059<br>BC095481<br>AK096246<br>AK126894<br>AK001635<br>AF519769<br>AK127561<br>BC065238<br>AY345143 |
| Length                                   | 10943                                                                                                                                 |
| Number of ATGs in frame                  | 66                                                                                                                                    |
| Number total of ATGs                     | 197                                                                                                                                   |
| Number of GTGs in frame                  | 59                                                                                                                                    |
| Number total of GTGs                     | 207                                                                                                                                   |
| Number of CTGs in frame                  | 54                                                                                                                                    |
| Number total of CTGs                     | 154                                                                                                                                   |
| GC percentage                            | 38                                                                                                                                    |
| Number of pyrimidine tracks              | 78                                                                                                                                    |

**Supplementary Figure S14.** 5'UTR (A) and 3'UTR (B) tables. **A-** Several informations about each of the 5' Untranslated regions (UTR) are given. For each UTR, the subset of transcripts having this UTR is displayed as well as the number of motifs ATG, GTG and CTG found either globally in the UTR sequence or in frame. The length and the GC content are also computed for each UTR. Finally, the number of pyrimidine tracks as well as the number of Micro ORF is displayed. **B-** Same information as in **A** for the 3'UTR region.

| miRNAs     |                 |                  |                         |                      |
|------------|-----------------|------------------|-------------------------|----------------------|
| Identifier | Name            | Gene coordinates | Chromosomal coordinates | Prediction algorithm |
| Group 1    |                 |                  |                         |                      |
| M1         | hsa-miR-600     | 155464 - 155470  | 225685376 - 225685382   | pita                 |
| M2         | hsa-miR-136     | 155475 - 155482  | 225685364 - 225685371   | pita                 |
| M3         | hsa-miR-320     | 155547 - 155554  | 225685292 - 225685299   | pictar               |
| M4         | hsa-miR-545     | 155564 - 155571  | 225685275 - 225685282   | pita                 |
| M5         | hsa-miR-16      | 155566 - 155573  | 225685273 - 225685280   | pictar               |
| M6         | hsa-miR-103     | 155566 - 155573  | 225685273 - 225685280   | pictar               |
| M7         | hsa-miR-15b     | 155566 - 155573  | 225685273 - 225685280   | pictar               |
| M8         | hsa-miR-195     | 155566 - 155573  | 225685273 - 225685280   | pictar               |
| M9         | hsa-miR-424     | 155566 - 155573  | 225685273 - 225685280   | targetscan           |
| M10        | hsa-miR-424     | 155566 - 155573  | 225685273 - 225685280   | pita                 |
| M11        | hsa-miR-107     | 155566 - 155573  | 225685273 - 225685280   | pictar               |
| M12        | hsa-miR-195     | 155566 - 155573  | 225685273 - 225685280   | targetscan           |
| M13        | hsa-miR-15b     | 155566 - 155573  | 225685273 - 225685280   | targetscan           |
| M14        | hsa-miR-15a     | 155566 - 155573  | 225685273 - 225685280   | pictar               |
| M15        | hsa-miR-497     | 155566 - 155573  | 225685273 - 225685280   | targetscan           |
| Group 2    |                 |                  |                         |                      |
| M1         | hsa-miR-141     | 157688 - 157695  | 225683151 - 225683158   | targetscan           |
| M2         | hsa-miR-200a    | 157688 - 157695  | 225683151 - 225683158   | targetscan           |
| M3         | hsa-miR-200a    | 157689 - 157695  | 225683151 - 225683157   | pita                 |
| M4         | hsa-miR-141     | 157689 - 157695  | 225683151 - 225683157   | pita                 |
| M5         | hsa-miR-421     | 157691 - 157698  | 225683148 - 225683155   | targetscan           |
| M6         | hsa-miR-374a    | 157761 - 157767  | 225683079 - 225683085   | pita                 |
| M7         | hsa-miR-374b    | 157761 - 157767  | 225683079 - 225683085   | pita                 |
| M8         | hsa-miR-216b    | 157804 - 157811  | 225683035 - 225683042   | targetscan           |
| M9         | hsa-miR-216b    | 157805 - 157811  | 225683035 - 225683041   | pita                 |
| M10        | hsa-miR-548d-3p | 157891 - 157898  | 225682948 - 225682955   | pita                 |
| M11        | hsa-miR-335     | 157900 - 157907  | 225682939 - 225682946   | targetscan           |
| M12        | hsa-miR-335     | 157900 - 157907  | 225682939 - 225682946   | pita                 |
| M13        | hsa-miR-641     | 157916 - 157922  | 225682924 - 225682930   | pita                 |
| M14        | hsa-miR-208b    | 157917 - 157924  | 225682922 - 225682929   | targetscan           |
| M15        | hsa-miR-208a    | 157917 - 157924  | 225682922 - 225682929   | targetscan           |
| M16        | hsa-miR-499-5p  | 157917 - 157924  | 225682922 - 225682929   | targetscan           |
| M17        | hsa-miR-512-5p  | 157925 - 157931  | 225682915 - 225682921   | pita                 |
| M18        | hsa-miR-548g    | 157931 - 157938  | 225682908 - 225682915   | pita                 |
| M19        | hsa-miR-128     | 157980 - 157988  | 225682858 - 225682866   | targetscan           |
| M20        | hsa-miR-27a     | 157981 - 157988  | 225682858 - 225682865   | targetscan           |

**Supplementary Figure S15.** Micro RNA table. This table summarizes information about micro RNAs binding sites found among the *ENAH* gene sequence. For each miRNA, we display its ID, gene and chromosomal coordinates, and the algorithm which allowed predicting this miRNA (Miranda, pita, targetscan). When a polyadenylation site is present between miRNA binding sites, a blue bar is displayed between miRNA binding sites because the binding of the different groups of miRNAs could be affected by alternative polyadenylation usage. (NB: Group1 and Group2 are not complete but were cropped in order to get both on the same page).

| Conserved exons       |                |                |
|-----------------------|----------------|----------------|
| Gene identifier mouse | Position Human | Position mouse |
| 5106                  | 2              | 2              |
| 5106                  | 3              | 3              |
| 5106                  | 4              | 5              |
| 5106                  | 6              | 7              |
| 5106                  | 8              | 9              |
| 5106                  | 9              | 10             |
| 5106                  | 10             | 11             |
| 5106                  | 11             | 12             |
| 5106                  | 13             | 13             |
| 5106                  | 14             | 14             |
| 5106                  | 15             | 15             |
| 5106                  | 15             | 16             |

**Supplementary Figure S16.** Conservation table. For each human gene, we display, in the first column, the FasterDB id of its orthologous in the mouse genome (as provided by Ensembl). Furthermore, we display for each human exon its orthologous, if exists, in the mouse genome using the FasterDB numbering.

A

| Expression    |                            |                            |                            |
|---------------|----------------------------|----------------------------|----------------------------|
| Exon position | Tissues                    | Cell lines                 | Cancer cell lines          |
| 1             | <a href="#">Expression</a> | <a href="#">Expression</a> | <a href="#">Expression</a> |
| 2             | <a href="#">Expression</a> | <a href="#">Expression</a> | <a href="#">Expression</a> |
| 3             | <a href="#">Expression</a> | <a href="#">Expression</a> | <a href="#">Expression</a> |
| 4             | <a href="#">Expression</a> | <a href="#">Expression</a> | <a href="#">Expression</a> |
| 5             | <a href="#">Expression</a> | <a href="#">Expression</a> | <a href="#">Expression</a> |
| 6             | <a href="#">Expression</a> | <a href="#">Expression</a> | <a href="#">Expression</a> |
| 7             | <a href="#">Expression</a> | <a href="#">Expression</a> | <a href="#">Expression</a> |
| 8             | <a href="#">Expression</a> | <a href="#">Expression</a> | <a href="#">Expression</a> |
| 9             | <a href="#">Expression</a> | <a href="#">Expression</a> | <a href="#">Expression</a> |
| 10            | <a href="#">Expression</a> | <a href="#">Expression</a> | <a href="#">Expression</a> |
| 11            | <a href="#">Expression</a> | <a href="#">Expression</a> | <a href="#">Expression</a> |
| 12            | <a href="#">Expression</a> | <a href="#">Expression</a> | <a href="#">Expression</a> |
| 13            | <a href="#">Expression</a> | <a href="#">Expression</a> | <a href="#">Expression</a> |
| 14            | <a href="#">Expression</a> | <a href="#">Expression</a> | <a href="#">Expression</a> |
| 15            | <a href="#">Expression</a> | <a href="#">Expression</a> | <a href="#">Expression</a> |

B

| Experiments | Expressed | <Gene expression level | <NI    | <Global SI | <Local SI | p-value |
|-------------|-----------|------------------------|--------|------------|-----------|---------|
| HEK293      | Yes       | 1637                   | 1.40   | 10.28      | 3.89      | 0.0001  |
| hESCt0      | Yes       | 1637                   | 1.49   | 10.92      | 4.93      | 0.0000  |
| Medullo     | Yes       | 1365                   | -7.14  | 1.03       | -2.86     | 0.0006  |
| NHA         | Yes       | 1357                   | -10.00 | -1.35      | -4.35     | 0.0003  |
| HConF       | Yes       | 934                    | -10.00 | -1.43      | -4.17     | 0.0002  |
| HPAF        | Yes       | 911                    | -14.29 | -1.96      | -6.25     | 0.0006  |
| ETec11      | No        | 893                    | -25.00 | -3.45      | -7.14     | 0.0003  |
| LNCAP       | Yes       | 889                    | 1.23   | 9.04       | 2.88      | 0.0001  |
| HVMF        | Yes       | 841                    | -14.29 | -2.04      | -6.67     | 0.0003  |
| AoAF        | Yes       | 836                    | -7.14  | 1.02       | -3.70     | 0.0003  |
| HMEC        | Yes       | 487                    | -1.52  | 4.82       | 2.31      | 0.0009  |
| BJ          | No        | 476                    | -16.67 | -2.22      | -5.00     | 0.0006  |
| HPAEC       | Yes       | 470                    | -10.00 | -1.32      | -3.85     | 0.0155  |
| HIPEpiC     | Yes       | 466                    | -9.09  | -1.19      | -2.13     | 0.0096  |
| MCF7        | Yes       | 463                    | -5.00  | 1.45       | -1.12     | 0.2966  |
| SKNS        | Yes       | 462                    | -7.14  | 1.06       | -3.33     | 0.0010  |
| HRCE        | Yes       | 436                    | -1.32  | 5.61       | 1.88      | 0.0064  |
| HAEpiC      | Yes       | 425                    | -7.69  | -1.05      | -1.35     | 0.0254  |
| HCF         | No        | 413                    | -16.67 | -2.22      | -2.08     | 0.0041  |
| HMVEC_dAd   | Yes       | 409                    | -12.50 | -1.67      | -3.23     | 0.0008  |
| HCPEpiC     | Yes       | 403                    | -10.00 | -1.43      | -2.33     | 0.0019  |
| AG09309     | No        | 403                    | -9.09  | -1.20      | -1.92     | 0.0040  |
| NHBE        | No        | 384                    | -1.28  | 5.75       | 2.63      | 0.0001  |
| NIIDFaec    | No        | 337                    | -6.67  | 1.09       | -1.85     | 0.0228  |
| JURKAT      | No        | 210                    | -5.88  | 1.26       | 1.05      | 0.4361  |
| NB4         | No        | 178                    | -7.69  | -1.06      | -1.02     | 0.4624  |
| TH2         | No        | 158                    | -7.69  | -1.06      | 0.00      | 0.0000  |
| K562        | No        | 156                    | -7.69  | -1.04      | -1.09     | 0.1798  |
| GM12878     | No        | 130                    | -6.25  | 1.19       | 0.00      | 0.0000  |
| TH1         | No        | 130                    | -6.67  | 1.13       | 0.00      | 0.0000  |
| BT-20       | No        | 128                    | -6.25  | 1.18       | 1.50      | 0.0419  |
| GM69        | No        | 107                    | -5.26  | 1.41       | 0.00      | 0.0000  |

### Supplementary Figure S17.

**A.** Expression table. In this table, we display three links: the first one leads to a table summarizing the expression of the exon in the tissues (column “Tissue”), the second one displays a table summarizing exon expression in the cell lines (column “Cell lines”) while the third link displays exon expression in cancer cell lines only (column “Cancer cell lines”). See Material and Methods for more information about tissues and cell lines included in these analyses.

**B.** Clicking on any “Expression” link in the “Cell lines” column for example, allows users to know the relative expression level of the gene across the cell line collection based on Encode Exon Array datasets. For each cell line, we computed gene expression level which represents the median of the intensity of all the probes associated to the exons of the gene and determine if the gene is expressed or not. This also allow to know which cell expresses a high or low level of the selected gene. For example, the *ENAH* gene expression level is higher in LnCAP than in GM69 cells.

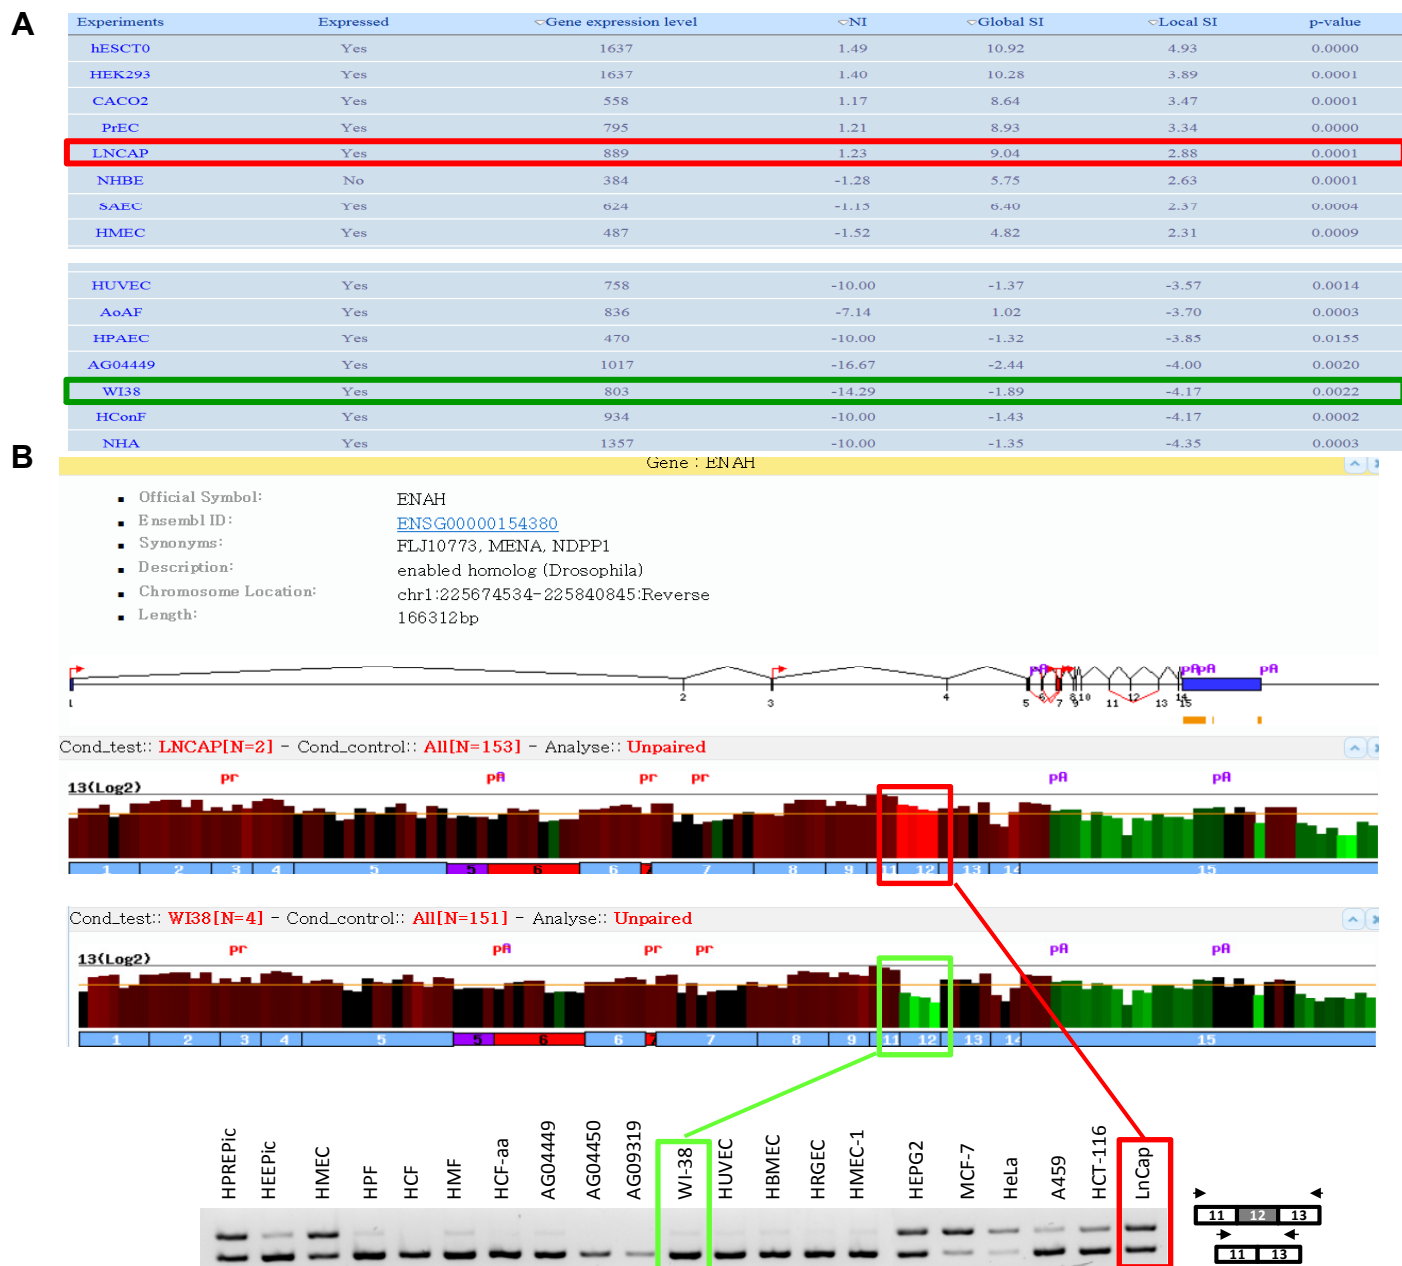

### Supplementary Figure S18. Exon array visualization web interface.

**A.** Inclusion rate of *ENAH* exon 12 across human cell lines. Clicking on “Expression” button corresponding to one exon (e.g. *ENAH* exon 12, **Supplementary Figure S17A**) generate a table containing the “NI” (exon normalized intensity), “Global SI”, and “Local SI” that are three different ways to calculate the inclusion rate of the selected exon in each sample. Higher “Global SI” or “Local SI” positive values indicate increased inclusion rates of the selected exon, while negative values indicate high exclusion rates. For instance, the *ENAH* exon 12 had high Global SI and Local SI values in the LNCAP cell line but negative ones in WI38 cells, suggesting that it has a high inclusion rate in LNCAP cells as compared to WI38 cells.

**B.** Clicking on any cell line open the ELEXIR interface allowing to Visualize exon array probe intensities in the selected cell line compared to all other cells (as shown here, LNCAP and WI38 cell lines as compared to other cells). Each rectangle corresponds to one probe above the corresponding exon. The height of each probe corresponds to its intensity level. Red probes indicate that the test condition had a higher intensity than the control condition, while green probes indicate a lower intensity than the control condition. Black probes indicate no difference between the conditions. As shown in Supplementary Figure S18B, most of the probes corresponding to the *ENAH* gene are in red, indicating that *ENAH* is more expressed in LNCAP cells as compared to most other cell lines (Supplementary Fig. S17). In addition, in agreement with the high SI values computed in LNCAP cells (Supplementary Fig. S18A), *ENAH* exon 12 probes are more intensively red than probes targeting other gene regions, suggesting that the *ENAH* exon 12 is more included in LNCAP cells as compared to other cells. Meanwhile, in agreement with low SI values calculated in WI38 cells (Supplementary Fig. S18A), exon 12 probes were green when comparing WI38 to other cells, indicating that exon 12 was skipped in WI38 cells (Supplementary Fig. S18B). These results were validated by RT-PCR (Supplementary Fig. S18B, lower panel).

**A**

| Experiments | Expressed | Gene expression level | NI    | Global SI | Local SI | p-value |
|-------------|-----------|-----------------------|-------|-----------|----------|---------|
| Testis      | Yes       | 90                    | -3.57 | -1.54     | -2.44    | 0.0031  |
| Spleen      | Yes       | 86                    | -4.55 | -1.92     | -2.00    | 0.0253  |
| Breast      | No        | 81                    | -3.33 | -1.45     | -1.61    | 0.0038  |
| Prostate    | No        | 90                    | -2.86 | -1.22     | -1.32    | 0.0266  |
| Cerebellum  | Yes       | 52                    | -2.63 | -1.09     | -1.14    | 0.2873  |
| Liver       | No        | 53                    | -2.13 | 1.26      | 1.19     | 0.0326  |
| Muscle      | No        | 103                   | -1.75 | 1.52      | 1.23     | 0.0785  |
| Pancreas    | No        | 80                    | -1.75 | 1.51      | 1.23     | 0.1171  |
| Kidney      | No        | 59                    | -2.78 | -1.18     | 1.24     | 0.2472  |
| Thyroid     | No        | 95                    | -1.19 | 2.23      | 1.58     | 0.0017  |
| Heart       | No        | 108                   | -1.14 | 2.36      | 1.62     | 0.0109  |

**B**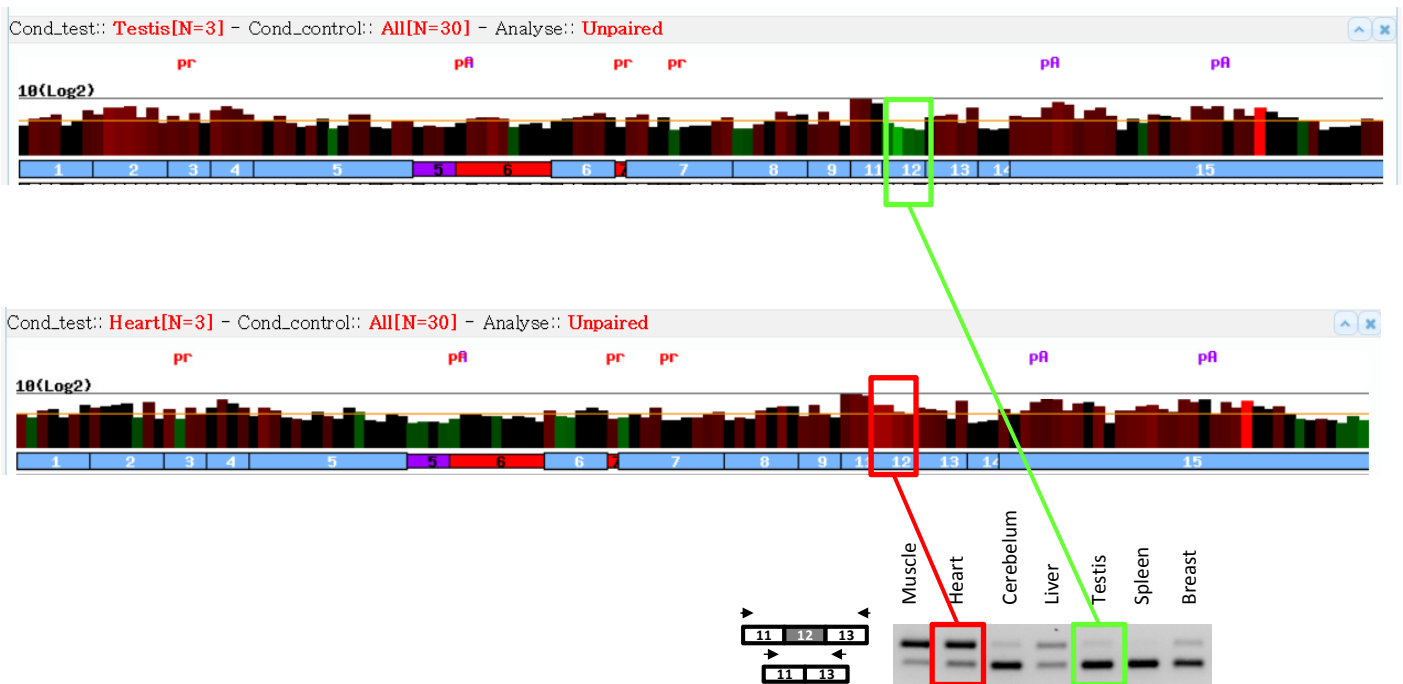

**Supplementary Figure S19** *ENAH* exon 12 was also predicted and validated to be more included in human testis as compared to heart.

**A.** Inclusion rate of *ENAH* exon 12 across human tissues. For each tissue, we compute Normalized Intensity (NI), Global Splicing Index (SI) and Local Splicing index (Si) values which represent different methods to calculate the inclusion level of an exon. Finally, we show the p-value of the student test based on the local Si values. The table can be sorted according to any of the columns. This table indicate that *ENAH* exon 12 gives rise to higher global or local SI values in the heart than in the testis, suggesting that *ENAH* exon 12 is included in heart but not in testis.

**B.** Visualization of exon array probe intensities in Testis and Heart compared to other tissues. The height of each probe corresponds to its intensity level. Red probes indicate inclusion in test condition while green probes indicate its exclusion when compared to controls. Black probes point no difference between both conditions. *ENAH* exon 12 probes are green in testis and red in heart suggesting that *ENAH* exon 12 is included in heart but not in testis as validated by RT-PCR.

| Splicing factors |            |           |               |    |
|------------------|------------|-----------|---------------|----|
| Splicing factor  | Exon array | CLIP data | Exon position |    |
| CELF1 (CUG-BP)   |            |           | 1 ▼           | Go |
| DAZAP1           |            |           | 1 ▼           | Go |
| ELAVL1 (HuR)     | Yes        | Yes       | 1 ▼           | Go |
| ESRP1/2          | Yes        |           | 1 ▼           | Go |
| FUS              |            | Yes       | 1 ▼           | Go |
| HNRNPA1          |            | Yes       | 1 ▼           | Go |
| HNRNPA2B1        |            | Yes       | 1 ▼           | Go |
| HNRNPAB          |            |           | 1 ▼           | Go |
| HNRNPC           |            | Yes       | 1 ▼           | Go |
| HNRNPF/HNRNPH1   | Yes        | Yes       | 1 ▼           | Go |
| HNRNPL           | Yes        |           | 1 ▼           | Go |
| HNRNPL_2         |            |           | 1 ▼           | Go |
| HNRNPM           |            | Yes       | 1 ▼           | Go |
| HNRNPU           |            | Yes       | 1 ▼           | Go |
| MBNL             |            |           | 1 ▼           | Go |
| NOVA1            |            |           | 1 ▼           | Go |
| PTBP1/2          | Yes        | Yes       | 1 ▼           | Go |
| QKI              |            |           | 1 ▼           | Go |
| RBFOX2           |            | Yes       | 1 ▼           | Go |
| RBM4             | Yes        |           | 1 ▼           | Go |
| SFRS3 (SRP20)    |            |           | 1 ▼           | Go |
| SFRS6 (SRP55)    |            |           | 1 ▼           | Go |
| SFRS7 (9G8)      |            |           | 1 ▼           | Go |
| SRSF1 (SF2ASF)   |            |           | 1 ▼           | Go |
| SRSF2 (SC35)     |            |           | 1 ▼           | Go |
| SRSF5 (SRP40)    |            |           | 1 ▼           | Go |
| TIA1/TIAL1       |            | Yes       | 1 ▼           | Go |
| TRA2A            |            |           | 1 ▼           | Go |
| TRA2B            |            |           | 1 ▼           | Go |
| YBX1             |            |           | 1 ▼           | Go |

**Supplementary Figure S20.** Splicing factor table allows to get for each selected exon, the motifs found for a list of splicing factors in the exon and 200 nucleotides in the flanking introns. This table indicates whether ‘Exon array” and “CLIP data” datasets are available for each splicing factor. Clicking on “Go” allows then to get further information as detailed d in the main manuscript (see Supplementary Fig. S21).



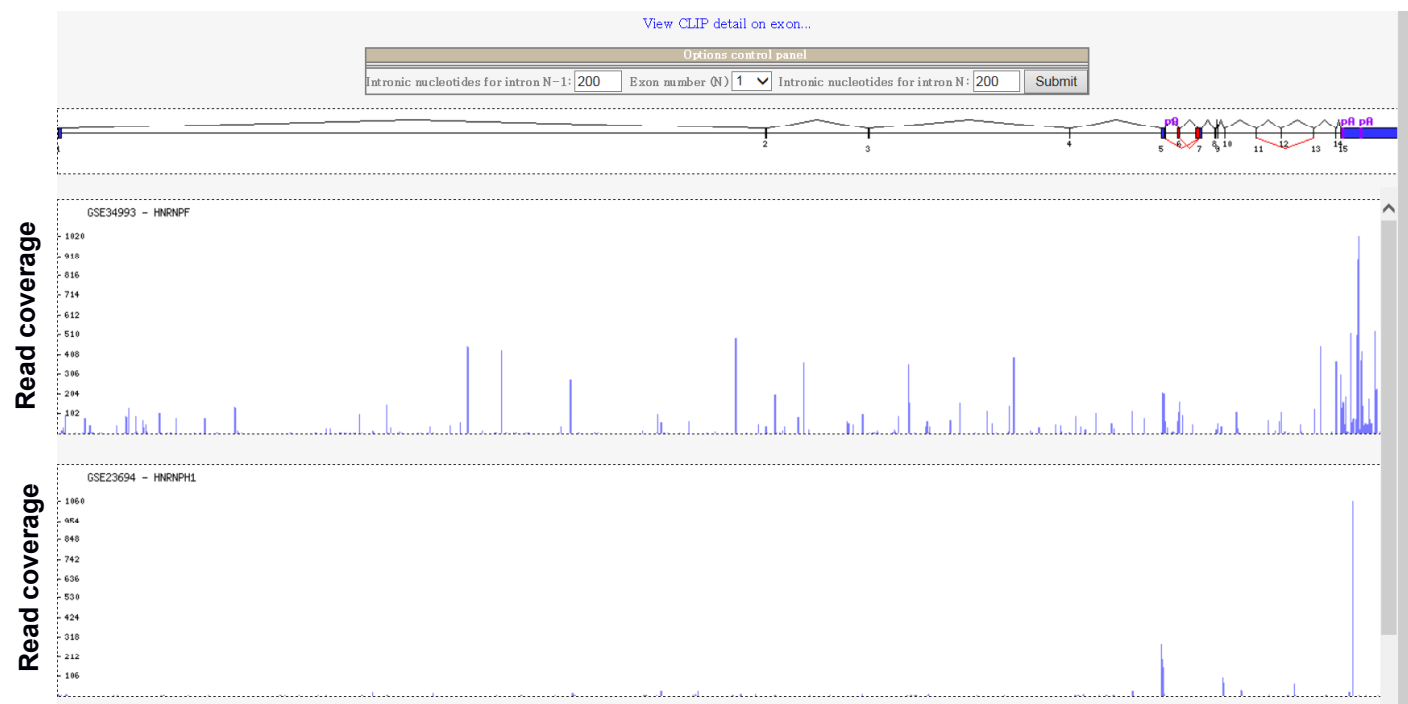

| Motif   | GSE                      | Contributors                         | PMID                     |
|---------|--------------------------|--------------------------------------|--------------------------|
| HNRNPF  | <a href="#">GSE34993</a> | Huelga SC, Yeo GW                    | <a href="#">22574288</a> |
| HNRNPH1 | <a href="#">GSE23694</a> | Katz Y, Wang ET, Airolidi E, Burge C | <a href="#">21057496</a> |

**Supplementary Figure S21: CLIP dataset visualization web interface.**

After selecting a splicing factor in the “Splicing Factor” table (see Supplementary Figure S20), users can visualize the read coverage of the selected splicing factor in CLIP-seq experiments referenced in the bottom screen. This allows to determine in which regions of the selected gene are enriched for the binding sites of the selected splicing factor. Selecting Exon and indicating the window in the flanking introns in the “Option control panel” allows to zoom in on the selected exon as described in the main manuscript (Fig. 5B).

|                | Cell Epi<br>Tissue A                                                                |  | Cell Epi<br>Tissue B                                                                |  | Cell Epi<br>Tissue C                                                                  |                                                                                       |
|----------------|-------------------------------------------------------------------------------------|--|-------------------------------------------------------------------------------------|--|---------------------------------------------------------------------------------------|---------------------------------------------------------------------------------------|
| EPI            |    |  |    |  |    |    |
| ESRP/RBM9/PTB  | +++ / - / -                                                                         |  | +++ / + / +                                                                         |  | +++ / + / +                                                                           |                                                                                       |
|                | Cell Fibro<br>Tissue A                                                              |  | Cell Fibro<br>Tissue B                                                              |  | Cell Fibro<br>Tissue C                                                                |                                                                                       |
| FIBRO          |    |  |    |  |    |    |
| ESRP/RBM9/PTB  | - / +++ / -                                                                         |  | + / +++ / +                                                                         |  | + / +++ / +                                                                           |                                                                                       |
|                | Tissue A                                                                            |  | Tissue B                                                                            |  | Tissue C                                                                              |                                                                                       |
| Organ / Tissue |  |  |  |  |  |  |
| Epi/Fibro      | +++ / +                                                                             |  | ++ / ++                                                                             |  | + / +++                                                                               |                                                                                       |

### Supplementary Figure S22.

We demonstrate that each major cell type (e.g. epithelial cells or fibroblasts) expresses a specific splicing pattern owing to the differential expression of splicing factors (comparing “EPI” to “FIBRO”). However, depending on the tissue origin, the ratio between the expression level of the different splicing factors may slightly changes leading to cell type- and tissue-specific splicing pattern (e.g. comparing Tissue A, B and C in “EPI” and Tissue A, B and C in “FIBRO”). In addition, the splicing pattern observed in an organ or a tissue that contain different cell populations could reflect a different composition of different cell types as schematized in the “Organ/Tissue” panel.
