# Supplementary material for: Endothelial, epithelial, and fibroblast cells exhibit specific splicing programs independently of their tissue of origin
Source: HighWire-hosted journal article supplement (doi:10.1101/gr.162933.113), 2013-12-04
Supplement: SuppMaterial.pdf [file SuppMaterial.pdf]

# Supplemental Material for FasterDB and Elexir

# Contents

|          |                                               |           |
|----------|-----------------------------------------------|-----------|
| <b>1</b> | <b>Datasets used to build FasterDB/Elexir</b> | <b>2</b>  |
| 1.1      | FasterDB transcript database . . . . .        | 2         |
| 1.2      | Elexir experimental datasets . . . . .        | 2         |
| 1.3      | FasterDB splicing factor datasets . . . . .   | 5         |
| 1.3.1    | siRNA datasets . . . . .                      | 5         |
| 1.3.2    | CLIPseq datasets . . . . .                    | 5         |
| <b>2</b> | <b>Algorithms and methods</b>                 | <b>7</b>  |
| 2.1      | FasterDB . . . . .                            | 7         |
| 2.1.1    | Splicing event detection . . . . .            | 7         |
| 2.1.2    | Complementary features . . . . .              | 8         |
| 2.2      | Exon array analysis and Elexir . . . . .      | 9         |
| 2.3      | Splicing factors . . . . .                    | 10        |
| 2.3.1    | siRNA dataset analysis . . . . .              | 10        |
| 2.3.2    | CLIPseq dataset analysis . . . . .            | 10        |
| <b>3</b> | <b>Web interfaces</b>                         | <b>12</b> |
| 3.1      | FasterDB tutorial . . . . .                   | 12        |
| 3.2      | Elexir tutorial . . . . .                     | 21        |
| 3.3      | Splicing factor tutorial . . . . .            | 24        |

# Part 1

## Datasets used to build FasterDB/Elexir

This chapter focuses on the datasets we have used. In particular, are mentioned in this section from where the datasets were obtained and how they were preprocessed. When applicable, the URLs of the tools are mentioned and corresponding publications are indicated.

### 1.1 FasterDB transcript database

Human and mouse exons have been collected from EnSEMBL<sup>1</sup> (release 60, assemblies GRCh37 and NCBI37) and aligned against the NCBI<sup>2</sup> transcript database using Megablast (v2.2.25).

The human and mouse exons extracted from the transcripts (hereinafter ‘transcript exons’) have been aligned against genomic sequences (using sim4<sup>3</sup>) as to define their chromosomal coordinates and have been clustered by genomic position in order to define their genomic counterparts (hereinafter ‘genomic exons’).

### 1.2 Elexir experimental datasets

Elexir proposes the visualization of the gene expression profiles at the exon level using public expression datasets. For each gene, two and three different profiles are generated respectively for mouse and human (i) expression over various tissues/organs, (ii) expression in various cell lines, and (iii) expression in various cancer cell lines.

The tissue expression profiles are derived from a sample dataset provided by Affymetrix<sup>4</sup>. It consists in 11 normal human triplicate tissues.

The cell line expression dataset was obtained from public repositories such as the ENCODE consortium project and represents a large collection of human and mouse cell lines from different origin (both in term of tissues and cell types). In addition, some datasets were extracted from GEO<sup>5</sup> using the following projects: GSE15998 (mouse), GSE19090 (human), and GSE15805 (human). The table 1.1 contains detailed information about the selected experiments for human, grouped by cell type of interest (endothelial, epithelial, and fibroblast). Other cell lines that have not been used in the original publication are presented in Table 1.2. The mouse cell lines

---

<sup>1</sup><http://www.ensembl.org>

<sup>2</sup><http://www.ncbi.nlm.nih.gov/>

<sup>3</sup><http://pbil.univ-lyon1.fr/members/duret/cours/inserm210604/exercise4/sim4.html>

<sup>4</sup>[http://www.affymetrix.com/support/technical/sample\\_data/exon\\_array\\_data.affx](http://www.affymetrix.com/support/technical/sample_data/exon_array_data.affx)

<sup>5</sup>[www.ncbi.nlm.nih.gov/geo/](http://www.ncbi.nlm.nih.gov/geo/)

are displayed in Table 1.3. For human, expression datasets from cancer cell lines have been gathered, details are displayed in Table 1.4.

| <i>Endothelial cell lines</i> |                                                |            |                  |
|-------------------------------|------------------------------------------------|------------|------------------|
| <b>Cell line</b>              | <b>Definition</b>                              | <b>Sex</b> | <b>Karyotype</b> |
| HBMEC                         | Brain microvascular endothelial cells          | U          | Normal           |
| HMVEC-dAd                     | Adult dermal microvascular endothelial cells   | F          | Normal           |
| HMVEC-dBl-Ad                  | Adult blood microvascular endothelial cells    | F          | Normal           |
| HMVEC-dBl-Neo                 | Neonatal blood microvascular endothelial cells | M          | Normal           |
| HMVEC-dNeo                    | Neonatal microvascular endothelial cells       | M          | Normal           |
| HPAEC                         | Pulmonary artery endothelial cells             | F          | Normal           |
| HRGEC                         | Renal glomerular endothelial cells             | U          | Normal           |
| HUVEC                         | Umbilical vein endothelial cells               | U          | Normal           |
| <i>Epithelial cell lines</i>  |                                                |            |                  |
| <b>Cell line</b>              | <b>Definition</b>                              | <b>Sex</b> | <b>Karyotype</b> |
| HAEPiC                        | Amniotic epithelial cells                      | U          | Normal           |
| HCPEpiC                       | Choroid plexus epithelial cells                | U          | Normal           |
| HEEPiC                        | Esophageal epithelial cells                    | U          | Normal           |
| HIPEpiC                       | Iris pigment epithelial cells                  | U          | Normal           |
| HMEC                          | Mammary epithelial cells                       | U          | Normal           |
| HNPCEpiC                      | Non-pigment ciliary epithelial cells           | U          | Normal           |
| HRCEpiC                       | Renal cortical epithelial cells                | U          | Normal           |
| HRPEpiC                       | Retinal pigment epithelial cells               | U          | Normal           |
| HRE                           | Renal epithelial cells                         | U          | Normal           |
| NHBE                          | Bronchial epithelial cells                     | F          | Normal           |
| PrEC                          | Prostate epithelial cell line                  | U          | Normal           |
| SAEC                          | Small airway epithelial cells                  | U          | Normal           |
| <i>Fibroblast cell lines</i>  |                                                |            |                  |
| <b>Cell line</b>              | <b>Definition</b>                              | <b>Sex</b> | <b>Karyotype</b> |
| AG04449                       | Fetal buttock/thigh fibroblast                 | M          | Normal           |
| AG04450                       | Fetal lung fibroblast                          | M          | Normal           |
| AG09319                       | Gum tissue fibroblasts                         | F          | Normal           |
| AoAF                          | Aortic adventitial fibroblast cells            | F          | Normal           |
| BJ                            | Skin fibroblast                                | M          | Normal           |
| Fibrobl                       | Child fibroblast                               | F          | Normal           |
| HCF                           | Cardiac fibroblasts                            | U          | Normal           |
| HCFaa                         | Cardiac fibroblasts (adult atrial)             | F          | Normal           |
| HFF                           | Foreskin fibroblast                            | M          | Normal           |
| HGF                           | Gingival fibroblasts                           | U          | Normal           |
| HMF                           | Mammary fibroblasts                            | F          | Normal           |
| HPAF                          | Pulmonary artery fibroblasts                   | U          | Normal           |
| HPdLF                         | Periodontal ligament fibroblasts               | M          | Normal           |
| HPF                           | Pulmonary fibroblasts                          | U          | Normal           |
| HVMF                          | Villous mesenchymal fibroblast cells           | U          | Normal           |
| NHDF-Ad                       | Adult dermal fibroblasts                       | F          | Normal           |
| NHDF-neo                      | Neonatal dermal fibroblasts                    | U          | Normal           |
| NHLF                          | Lung fibroblasts                               | U          | Normal           |

Table 1.1: Human cell lines for which exon expression profiles are included in FasterDB, grouped by cell type of interest. (M male, F female, U unknown)

| Cell line | Definition                   | Sex | Karyotype |
|-----------|------------------------------|-----|-----------|
| AG09309   | Adult toe fibroblast         | F   | -         |
| AG10803   | Abdominal skin fibroblasts   | M   | -         |
| GM12878   | B-lymphocyte                 | F   | Normal    |
| GM06990   | B-lymphocyte                 | F   | -         |
| HAc       | Astrocytes-cerebellar        | U   | Normal    |
| HA-sp     | Astrocytes spinal cord       | U   | Normal    |
| HCM       | Cardiac myocytes             | U   | Normal    |
| HConF     | Conjunctival fibroblast      | U   | -         |
| HEK293    | Embryonic kidney             | U   | -         |
| hESC      | Human embryonic stem cell    | -   | -         |
| HL-60     | Promyelocytic leukemia cells | F   | Cancer    |
| HSMM      | Skeletal muscle myoblasts    | U   | Normal    |
| Jurkat    | T lymphoblastoid             | M   | Cancer    |
| K562      | Leukemia                     | F   | Cancer    |
| NB4       | Leukemia                     | U   | Cancer    |
| NH-A      | Astrocytes                   | U   | Normal    |
| RPTEC     | Renal                        | U   | Normal    |
| SKMC      | Skeletal muscle              | U   | Normal    |
| SK-N-SH   | Neuroblastoma                | F   | Cancer    |
| Th1       | Primary Th1 T cells          | U   | -         |
| Th2       | Primary Th2 T cells          | U   | -         |
| WI-38     | Embryonic lung               | F   | Normal    |

Table 1.2: Other human cell lines for which exon expression profiles are included in FasterDB. (M male, F female, U unknown)

| Cell line  | Tissue                                               | Cell type        | Disease                                     |
|------------|------------------------------------------------------|------------------|---------------------------------------------|
| Raw264.7   | Abelson murine leukemia virus-induced tumor; ascites | Macrophage       | Abelson murine leukemia virus-induced tumor |
| Neuro-2a   | Brain                                                | Neuroblast       | Neuroblastoma                               |
| C3H/10T1/2 | Embryo                                               | -                | Sarcoma                                     |
| BAF3       | Bone marrow                                          | pro-B-cell       | -                                           |
| MIMCD      | Kidney, medulla/collecting duct                      | SV40 transformed | -                                           |
| NIH/3T3    | Embryo                                               | Fibroblast       | -                                           |
| 3T3-L1     | Embryo                                               | Fibroblast       | -                                           |
| C2C12      | Muscle                                               | Myoblast         | -                                           |
| Min6       | Pancreatic                                           | Beta cell        | -                                           |

Table 1.3: Mouse cell lines for which exon expression profiles are included in FasterDB.

| Cell line | Definition                      | Sex | Karyotype |
|-----------|---------------------------------|-----|-----------|
| A549      | Lung carcinoma                  | M   | Cancer    |
| BE2-C     | Neuroblastoma                   | M   | Cancer    |
| Caco-2    | Colorectal adenocarcinoma       | M   | Cancer    |
| Gliobla   | Glioblastoma                    | U   | Cancer    |
| HCT-116   | Colorectal carcinoma            | M   | Cancer    |
| HeLa-S3   | Cervical carcinoma              | F   | Cancer    |
| HepG2     | Hepatocellular carcinoma        | M   | Cancer    |
| LNCAp     | Prostate adenocarcinoma         | M   | Cancer    |
| MCF-7     | Mammary gland, adenocarcinoma   | F   | Cancer    |
| Medullo   | Medulloblastoma                 | U   | Cancer    |
| PANC-1    | Pancreatic carcinoma            | M   | Cancer    |
| SK-N-MC   | Supra-orbital human brain tumor | F   | Cancer    |
| WERI-Rb-1 | Retinoblastoma                  | F   | Cancer    |

Table 1.4: Cancer cell lines for which exon expression profiles are included in FasterDB. (M male, F female, U unknown)

## 1.3 FasterDB splicing factor datasets

Additional experimental datasets have been collected for splicing factors. The Table 1.5 contains the splicing factors for which datasets have been collected as well as their canonical binding motifs.

| Splicing factor                                                                                                                                                     | Array datasets | CLIP datasets | Motifs                    |
|---------------------------------------------------------------------------------------------------------------------------------------------------------------------|----------------|---------------|---------------------------|
| 9G8                                                                                                                                                                 |                |               | acgagagay, wggacra        |
| CUG-BP                                                                                                                                                              |                |               | ygctyk, stgt              |
| DAZAP1                                                                                                                                                              |                |               | aaatag                    |
| ESRP                                                                                                                                                                | ✓              |               | tgg                       |
| FOX2                                                                                                                                                                |                | ✓             | gcatg                     |
| FUS                                                                                                                                                                 |                | ✓             | ggtg                      |
| HNRNPA1                                                                                                                                                             |                | ✓             | tagrsw                    |
| HNRNPA2B1                                                                                                                                                           |                | ✓             | gtagtag, aggatng          |
| HNRNPAB                                                                                                                                                             |                |               | atagca                    |
| HNRNPC                                                                                                                                                              |                | ✓             | tttt                      |
| HNRNPF                                                                                                                                                              |                | ✓             | gtngtng, gtggat           |
| HNRNPH1                                                                                                                                                             | ✓              | ✓             | dggg, ggygg               |
| HNRNPL                                                                                                                                                              | ✓              |               | cacaca                    |
| HNRNPL_2                                                                                                                                                            |                |               | caca                      |
| HNRNPM                                                                                                                                                              |                | ✓             | ggttggtt                  |
| HNRNPU                                                                                                                                                              |                | ✓             | gtgtg                     |
| HuR                                                                                                                                                                 | ✓              | ✓             | tttdttt                   |
| MBNL                                                                                                                                                                |                |               | ygcy                      |
| NOVA1                                                                                                                                                               |                |               | ycab                      |
| PTB                                                                                                                                                                 | ✓              | ✓             | ctctct, tctt              |
| QKI                                                                                                                                                                 |                |               | actaa                     |
| RBM4                                                                                                                                                                | ✓              |               | gggg                      |
| SC35                                                                                                                                                                |                |               | tgcygyy, gryymsyr         |
| SF2ASF                                                                                                                                                              |                |               | crsmgsw, tgrwgvh          |
| SRP20                                                                                                                                                               |                |               | wewwc, ctcktcy            |
| SRP40                                                                                                                                                               |                |               | yywewss                   |
| SRP55                                                                                                                                                               |                |               | yrckrm                    |
| TIA                                                                                                                                                                 |                | ✓             | ttttt                     |
| TRA2A                                                                                                                                                               |                |               | gaagaggaag                |
| TRA2B                                                                                                                                                               |                |               | aagtgtt, gaagaa, ghvvganr |
| YB1                                                                                                                                                                 |                |               | caaccacaa                 |
| R = A or G, Y = C or T, K = G or T, M = A or C, S = C or G, W = A or T, B = C or G or T,<br>D = A or G or T, H = A or C or T, V = A or C or G, N = A or C or G or T |                |               |                           |

Table 1.5: Summary of the available datasets for various splicing factors.

### 1.3.1 siRNA datasets

The Table 1.5 contains the list of splicing factors for which exon arrays have been performed upon their depletion through siRNA and have been uploaded in our database. The Table 1.6 contains more details about the origin of the datasets. More details about the way these datasets have been processed can be found in section 2.2.

### 1.3.2 CLIPseq datasets

FasterDB also permits the visualization of CLIPseq datasets of several splicing factors. These datasets were collected from public databases and processed when necessary. The Table 1.5

contains the list of splicing factors for which such datasets have been uploaded in our database. The Table 1.7 contains details about the origin of the datasets for both human and mouse.

| siRNA target | GEO      | Contributors              | PubMed   |
|--------------|----------|---------------------------|----------|
| ESRP         | GSE17468 | Warzecha CC <i>et al.</i> | 19829082 |
| HNRNP H      | GSE12386 | Xiao X                    | 19749754 |
| HNRNP L      | GSE8945  | Hung LH and Bindereif A   | 18073345 |
| HuR          | GSE29780 | Mukherjee N               | 21723170 |
| PTB          | GSE23514 | Llorian M <i>et al.</i>   | 20711188 |
| RBM4         | GSE32933 | Markus MA <i>et al.</i>   | -        |

Table 1.6: Origin of the siRNA datasets integrated into FasterDB.

| <i>Human</i>    |             |                             |          |
|-----------------|-------------|-----------------------------|----------|
| Splicing factor | GEO         | Contributors                | PubMed   |
| FOX2            | UCSC Track  | Yeo GW <i>et al.</i>        | 19136955 |
| FUS             | GSE40651    | Yeo GW and Cleveland DW     | 2302393  |
| hnRNP A1        | GSE34993    | Huelga SC and Yeo GW        | 22574288 |
| hnRNP A2B1      | GSE34993    | Huelga SC and Yeo GW        | 22574288 |
| hnRNP C         | E-MTAB-1371 | Zarnack <i>et al.</i>       | 23374342 |
| hnRNP F         | GSE34993    | Huelga SC and Yeo GW        | 22574288 |
| hnRNP H1        | GSE23694    | Katz Y <i>et al.</i>        | 21057496 |
| hnRNP M         | GSE34993    | Huelga SC and Yeo GW        | 22574288 |
| hnRNP U         | GSE34993    | Huelga SC and Yeo GW        | 22574288 |
| hnRNP U         | GSE34491    | Xiao R <i>et al.</i>        | 22325991 |
| HuR             | GSE29943    | Lebedeva S <i>et al.</i>    | 21723171 |
| HuR             | GSE29780    | Mukherjee N                 | 21723170 |
| PTB             | GSE19323    | Xue Y <i>et al.</i>         | 20064465 |
| TIA1            | E-MTAB-432  | Wang Z <i>et al.</i>        | 21048981 |
| TIAL1           | E-MTAB-432  | Wang Z <i>et al.</i>        | 21048981 |
| <i>Mouse</i>    |             |                             |          |
| Splicing factor | GEO         | Contributors                | PubMed   |
| FUS             | GSE40651    | Yeo GW and Cleveland DW     | 2302393  |
| TDP43           | GSE40651    | Yeo GW and Cleveland DW     | 2302393  |
| Tra2            | UCSC Track  | Grellscheid S <i>et al.</i> | 22194695 |

Table 1.7: Provenance of the CLIPseq datasets integrated into FasterDB for human and mouse.

# Part 2

## Algorithms and methods

### 2.1 FasterDB

#### 2.1.1 Splicing event detection

The alignments between the human and mouse transcripts and their respective genomes described in 1.1 allow the definition of seven major splicing events (alternative first exon, alternative last exon, alternative 3' splice site, alternative 5' splice site, intron retention, exon deletion, and exon skipping) whose definitions can be found below:

**Alternative first exon.** To be defined as an alternative first exon, a transcript exon has to be the first exon of at least one transcript. In addition, if there are other internal exons at this genomic position, it has to start at least 10 nt upstream of the first position of the corresponding genomic exon.

**Alternative last exon.** To be defined as an alternative last exon, a transcript exon has to be the last exon of at least one transcript and, if there were other internal exons at this genomic position, it has to end at least 10 nt downstream of the last position of the corresponding genomic exon.

**Alternative 3' splice site.** It corresponds to a transcript exon whose starting position is different from the starting position of its corresponding genomic exon.

**Alternative 5' splice site.** It corresponds to a transcript exon whose ending position is different from the ending position of its corresponding genomic exon.

**Intron retention.** An intron retention corresponds to a complete intronic sequence being included into at least one transcript.

**Exon deletion.** There exists an exon deletion when a transcript exon presents an internal deletion when aligned against its corresponding genomic exon.

**Exon skipping.** An exon skipping event is detected when an exon is absent in at least one transcript and if it is not an alternative first or last exon.

In addition, in order to identify even more alternative last exons, the dbEST database<sup>1</sup> was obtained from the NCBI. Sequences annotated as 3' EST and/or where presence of a polyat tail was reported have been retrieved. Polyadenylation tails have been extracted and sequences

---

<sup>1</sup><http://www.ncbi.nlm.nih.gov/dbEST/>



were then aligned to the genome using Blat<sup>2</sup>. These novel alignments allowed us to identify additional alternative last exons following the criteria described above.

These splicing events can then be used to guide the expression data analysis (in order to check only the known splicing events). Alternatively, the expression data analysis can be made with no *a priori* (as to be able to detect novel splicing events).

## 2.1.2 Complementary features

Additional characteristics provided by other databases and/or processed by a series of tools have been added to FasterDB. The following paragraphs describes these features, their origin and, if necessary, how the datasets were processed.

### miRNA binding sites

miRNA binding sites were predicted using Pita<sup>3</sup>, Miranda<sup>4</sup> and Pictar<sup>5</sup> algorithms. All predictions were linked to the MiR database<sup>6</sup>.

### Splice sites

For each predicted alternative splice site, scores were computed using MaxEntScan<sup>7</sup>. This score is calculated using a sequence that covers both sides of the splicing site (3 bases in the exon and 6 bases in the intron for 5' splice sites; 20 bases in the intron and 3 bases in the exon for 3' splice sites). MaxEntScan uses Maximum Entropy Models (MEMs) to compute log odds ratios that represent the likelihood of being a real splicing site (the higher a score, the higher the probability that the associated sequence is a true splice site).

### UTR and motifs in UTRs

For each gene, and using their associated transcripts, a non redundant repertory of untranslated regions was established. For each transcript, coding regions were defined as being the longest sequence between a start and a stop codons. Thus, 5' untranslated transcript regions were defined as regions upstream of the start codon and 3' untranslated transcript regions were defined as regions downstream of the stop codon. Then transcript UTRs were aligned and clustered similarly to what is described in section 1.1. For each group, the longest untranslated region was defined as the genomic UTR reference. If the sequence was small, we only kept it when a transcription start site was present at the beginning of the region or a polyadenylation site was present at the end for 5' UTR and 3' UTR respectively. Furthermore, genomic UTR references were analyzed using PatSearch in order to determine if putative motifs were present.

### Conserved exons

Conserved exons between human and mouse organisms have been identified. In a first step, human genes and their orthologous mouse genes were retrieved from EnSEMBL using Biomart<sup>8</sup>. Each human exon was then aligned against each exon of its orthologous mouse gene. Conserved

---

<sup>2</sup><http://genome.ucsc.edu/cgi-bin/hgBlat?command=start>

<sup>3</sup>[http://genie.weizmann.ac.il/pubs/mir07/mir07\\_prediction.html](http://genie.weizmann.ac.il/pubs/mir07/mir07_prediction.html)

<sup>4</sup><http://www.ebi.ac.uk/enright-srv/microcosm/htdocs/targets/v5/>

<sup>5</sup><http://pictar.mdc-berlin.de/>

<sup>6</sup>[www.mirbase.org/](http://www.mirbase.org/)

<sup>7</sup>[genes.mit.edu/burgelab/](http://genes.mit.edu/burgelab/)

<sup>8</sup><http://www.ensembl.org/biomart/martview/>

exons were defined if the percentage identity and the DNA coverage criterias validated our thresholds.

## Splicing factor binding sites

Splicing factor binding sites were sought using PatSearch on the genomic sequences. Patterns shorter than 10 nucleotides, as defined in the IUPAC code, were searched. Each exon sequence and the first 200 nucleotides of both flanking introns were mined for motifs.

## *in silico* PCR

A multi-alignment of the transcript exons was performed using ClustalW. For a given gene, the sequences of the transcript exons corresponding to one genomic exon were aligned. The results for each genomic exon position were then assembled to present the multi-alignment of the different cDNAs. This is used later to help users to design PCR primers.

## 2.2 Exon array analysis and Elexir

Elexir is a tool designed to analyze and visualize the gene differential expression profile between two conditions. The exon arrays are first analyzed using the APT affymetrix software<sup>9</sup> (ignoring the mismatch probes, using RMA and quantile normalization), this produces the DABG and the raw intensities for each probe.

Then, and contrary to most approaches, the intensities are not summarized per exon or per gene. Instead, expression ratios between conditions A and B are computed for each probe and only then, the signal (*i.e.*, the ratios) is summarized per exon or per gene. Notice that only probes with no cross hybridization, low GC percentage ( $< 18\%$ ), and detection above the background (DABG p-value  $< 0.05$ ) are selected. When there are not enough probes or if detection above the background is not consistent, the gene is considered as not expressed (see the two algorithms below).

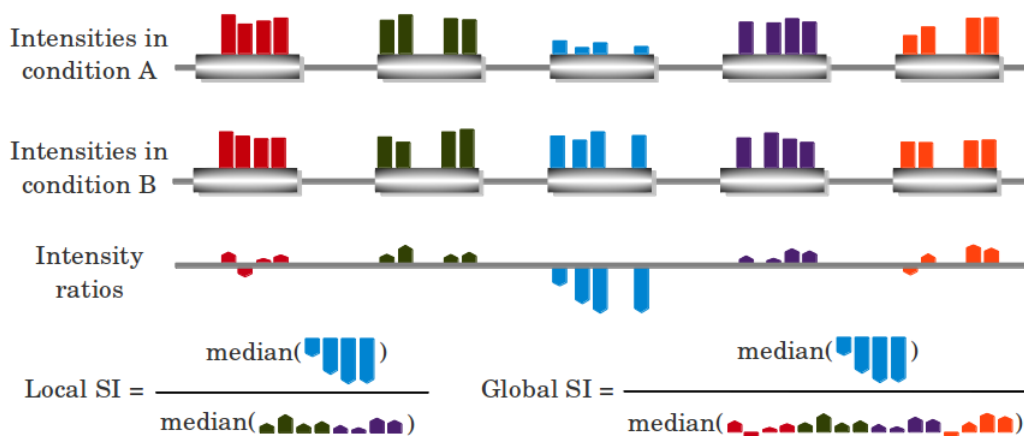

Figure 2.1: Illustration of the algorithms used to compute the Local SI and Global SI.

<sup>9</sup>[http://www.affymetrix.com/estore/partners\\_programs/programs/developer/tools/powertools.affx](http://www.affymetrix.com/estore/partners_programs/programs/developer/tools/powertools.affx)

In order to detect splicing events, inclusion/exclusion rates of each exon are computed, using two distinct algorithms that are summarized below and illustrated in figure 2.1. Both methods start from the same data, that is the ratio of the intensities between the two conditions for all probes. The objective is then to compute a splicing index for a given exon as illustrated in figure 2.1. When possible, the Local SI values are accompanied by a p-value obtained with a Student t-test to assess their significance.

**Local Splicing index (Local SI)** With this method, the raw differential expression of the exon  $n$  is summarized by computing the median of the intensity ratios ( $IntA$ ,  $IntB$ ) for all probes that target this exon (see equation (2.1)). This value is then adjusted by the differential expression of the flanking exons, which is computed exactly like the raw differential expression of the exon  $n$ .

$$Local\ SI = \frac{\underset{probe\ i \in exon\ n}{median} \left( \frac{IntA_i}{IntB_i} \right)}{\underset{probe\ j \in exon\ n-1, n+1}{median} \left( \frac{IntA_j}{IntB_j} \right)} \quad (2.1)$$

**Global Splicing Index (Global SI)** Similarly to the first method, the raw differential expression of the exon is summarized by computing the median of the intensity ratios for all probes that target this exon (see equation (2.2)). Then, this value is adjusted in a different way, by taking the raw differential expression of the whole gene (instead of the flanking exons).

$$Global\ SI = \frac{\underset{probe\ i \in exon\ n}{median} \left( \frac{IntA_i}{IntB_i} \right)}{\underset{probe\ j \notin exon\ n}{median} \left( \frac{IntA_j}{IntB_j} \right)} \quad (2.2)$$

## 2.3 Splicing factors

### 2.3.1 siRNA dataset analysis

Exon array after splicing factor depletion (see Table 1.6) have been analyzed as described above (section 2.2).

### 2.3.2 CLIPseq dataset analysis

When available, direct integration of processed datasets was performed. When necessary, the positions were converted to hg19 using [liftover](http://genome.ucsc.edu/cgi-bin/hgLiftOver)<sup>10</sup>. If only the raw files were available, the CLIP datasets have been mapped using [Bowtie](http://bowtie-bio.sourceforge.net/index.shtml)<sup>11</sup>. The Table 2.1 summarizes what has been done for each dataset.

---

<sup>10</sup><http://genome.ucsc.edu/cgi-bin/hgLiftOver>

<sup>11</sup><http://bowtie-bio.sourceforge.net/index.shtml>

| <i>Human</i>   |                           |                                                            |
|----------------|---------------------------|------------------------------------------------------------|
| <b>Dataset</b> | <b>Splicing factor(s)</b> | <b>Method</b>                                              |
| GSE40651       | FUS                       | Data lifted to hg19, integration                           |
| GSE34993       | hnRNP A1/A2B1/F/M/U       | Data lifted to hg19, integration                           |
| EMTAB1371      | hnRNP C                   | Simple integration                                         |
| GSE23694       | hnRNP H1                  | SAM to BED conversion,<br>data lifted to hg19, integration |
| GSE34491       | hnRNP U                   | Data lifted to hg19, integration                           |
| GSE29943       | HuR                       | Adapter removal, Bowtie mapping,<br>integration            |
| GSE29780       | HuR                       | Simple integration                                         |
| GSE19323       | PTB                       | Data lifted to hg19, integration                           |
| EMTAB432       | TIA1/TIAL1                | Adapter removal, Bowtie mapping,<br>integration            |
| UCSC Track     | FOX2                      | Data lifted to hg19, integration                           |
| <i>Mouse</i>   |                           |                                                            |
| <b>Dataset</b> | <b>Splicing factor(s)</b> | <b>Method</b>                                              |
| GSE40651       | FUS/TDP43                 | Simple integration                                         |
| UCSC Track     | Tra2                      | Simple integration                                         |

Table 2.1: Analysis of the CLIPseq datasets for FasterDB

# Part 3

## Web interfaces

This chapter describes the different web interfaces to our tools.

### 3.1 FasterDB tutorial

#### FasterDB color code

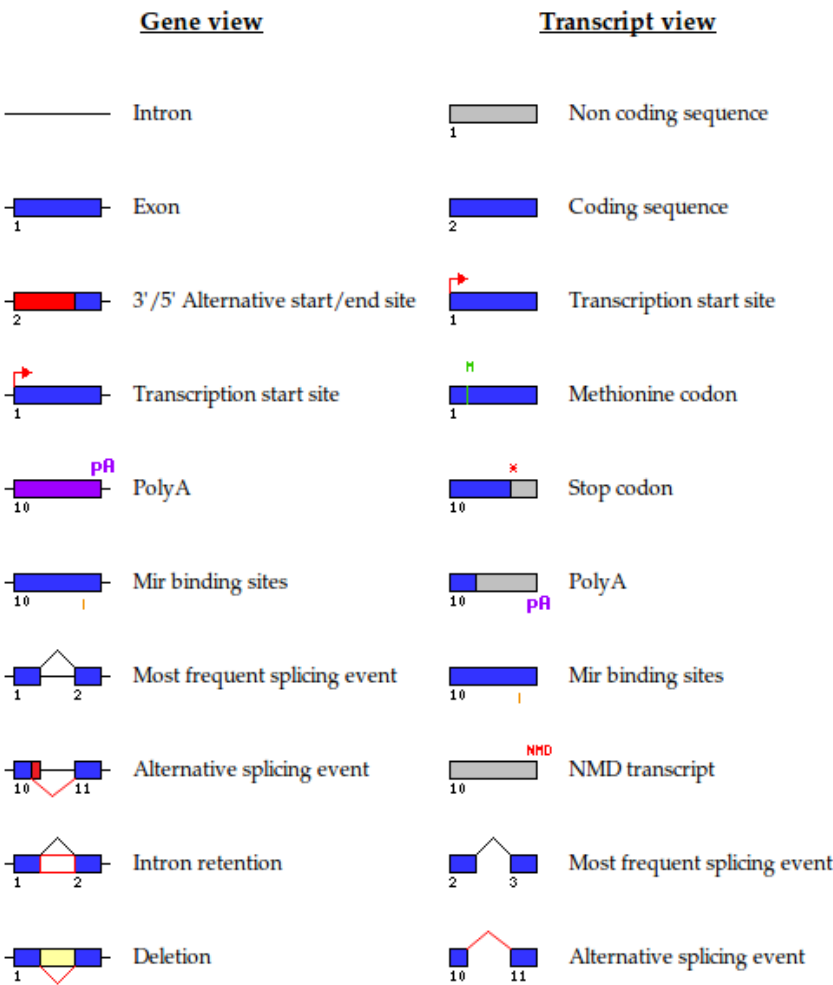

Figure 3.1: FasterDB and Elexir are using a specific color code to draw genes, transcripts and exons.

# FasterDB Search engine

1

Search for a gene: ?  Species:

Paste a sequence (>24 nucleotides) to identify the corresponding gene(s):

2

Search options. Sequence:  Species:

[Download customized exons lists](#)

| Result number | Gene description                                                                         |
|---------------|------------------------------------------------------------------------------------------|
| 1             | WNK1<br>HSAN2, HSN2, PRKWNK1<br>ENSG00000060237<br>WNK lysine deficient protein kinase 1 |

3

Figure 3.2: FasterDB home page is the search page. It can be used to access the gene pages (see above the search corresponding to the human WNK1 gene). The search engine can be used by providing keywords, gene identifiers (ENSEMBL, HUGO gene name, synonyms or gene description), chromosomal coordinates (square 1), or sequence (perfect match sequence against FasterDB genes - square 2) for mouse or human. The results of the request are displayed below the search parameters (square 3). Clicking on the help icon displays the search criteria for users as well as clickable examples.

## FasterDB gene page for human WNK1

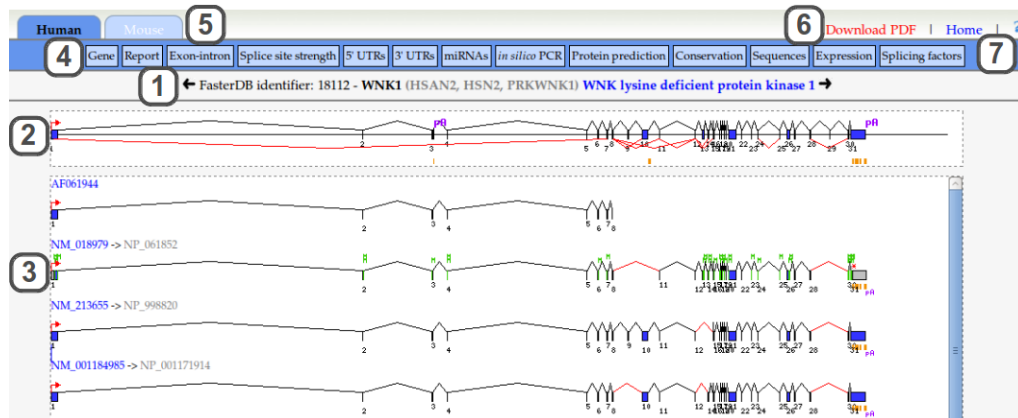

Figure 3.3: The gene page contains all the information about a given gene. In particular, it contains information about the gene (FasterDB identifier, HUGO name and synonyms) (square 1), a schematic representation of the gene (see section 3.1 for the color code) (square 2), a schematic representation of the transcripts associated to the gene (square 3), a toolbar with several buttons, each displaying additional information about the gene (see the following figures for more information) (square 4), a link to the FasterDB human's orthologous gene in the mouse genome (or vice-versa) (square 5), and a link to download the graphical representation of this gene page - square 6).

It is possible to browse the neighboring genes downstream or upstream by using the left or right arrows located around to the basic gene information (square 1). Alternatively, it is also possible to go back to the home page for another search (square 7). The help icon toggles the display of the figure legend (*i.e.*, color code as in Figure 3.2). Graphical elements are clickable to either obtain the corresponding fasta sequences (*e.g.*, exons, introns) or to link out to external references, such as the NCBI, where more information is available (*e.g.*, transcripts).

## FasterDB gene table for human WNK1

|                                  | Gene                                                                                                                                                                                                                                                                                                                                        |
|----------------------------------|---------------------------------------------------------------------------------------------------------------------------------------------------------------------------------------------------------------------------------------------------------------------------------------------------------------------------------------------|
| Symbol                           | WNK1                                                                                                                                                                                                                                                                                                                                        |
| Synonyms                         | HSAN2, HSN2, PRKWINK1                                                                                                                                                                                                                                                                                                                       |
| Description                      | WNK lysine deficient protein kinase 1                                                                                                                                                                                                                                                                                                       |
| Ensembl link                     | <a href="#">ENSG00000060237</a>                                                                                                                                                                                                                                                                                                             |
| Chromosome                       | 12 - forward strand                                                                                                                                                                                                                                                                                                                         |
| Chromosomal location (UCSC link) | <a href="#">862089 - 1020618 (158530bp)</a>                                                                                                                                                                                                                                                                                                 |
| Sequence                         | <a href="#">sequence</a>                                                                                                                                                                                                                                                                                                                    |
| Associated transcripts           | <a href="#">AF061944</a> <a href="#">NM_018979</a> <a href="#">NM_213655</a> <a href="#">NM_001184985</a> <a href="#">NM_014823</a> <a href="#">BC021121</a> <a href="#">BC071959</a> <a href="#">BC094862</a> <a href="#">AJ296290</a> <a href="#">BC141881</a> <a href="#">AB002342</a> <a href="#">DQ925669</a> <a href="#">BC013629</a> |

Figure 3.4: The gene table can be displayed by clicking on the 'Gene' button of the main toolbar (see Figure 3.3). This table shows general information about the gene of interest (official symbol, synonyms, description, chromosomal location and associated transcripts). Links to external resources are also available: clicking on the Ensembl ID of the gene leads to its Ensembl page while clicking on chromosomal coordinates directs to the UCSC browser page of the gene. Finally, clicking on 'sequence' displays the fasta sequences of all the exons and introns of the gene.

## FasterDB report table for human WNK1

| Report                                   |                                  |
|------------------------------------------|----------------------------------|
| Exon                                     | Number of supporting transcripts |
| Transcription initiation & first exon(s) |                                  |
| 1                                        | 1                                |
| Transcription termination & last exon(s) |                                  |
| 3                                        | 3                                |
| 31                                       | 4                                |
| Exon skipping                            |                                  |
| 2                                        | 1                                |
| 3                                        | 1                                |
| 4                                        | 1                                |
| 5                                        | 1                                |
| 6                                        | 1                                |
| 9                                        | 6                                |
| 10                                       | 5                                |
| 11                                       | 1                                |
| 13                                       | 5                                |
| 14                                       | 4                                |
| 29                                       | 7                                |
| Alternative 3' splice sites              |                                  |
| 7                                        | 1                                |
| 12                                       | 1                                |
| Alternative 5' splice sites              |                                  |
| 1                                        | 1                                |
| 24                                       | 1                                |

| Polyadenylation |          |                                   |                                          |         |            |                  |
|-----------------|----------|-----------------------------------|------------------------------------------|---------|------------|------------------|
| Identifier      | Position | Gene coordinates of cleavage site | Chromosomal coordinates of cleavage site | Pattern | PolyA tail | Accession number |
| PA1             | 3        | 74575                             | 936663                                   | AATAAA  | yes        | BC021121         |
| PA2             | 3        | 74575                             | 936663                                   | AATAAA  | yes        | BC071959         |
| PA3             | 3        | 74575                             | 936663                                   | AATAAA  | yes        | BC094862         |
| PA4             | 31       | 158530                            | 1020618                                  | AATAAA  | yes        | NM_018979        |
| PA5             | 31       | 158530                            | 1020618                                  | AATAAA  | no         | NM_213655        |
| PA6             | 31       | 158530                            | 1020618                                  | AATAAA  | no         | NM_001184985     |
| PA7             | 31       | 158530                            | 1020618                                  | AATAAA  | yes        | NM_014823        |

| Alternative 3' splice site (acceptor) |          |               |                       |
|---------------------------------------|----------|---------------|-----------------------|
| Identifier                            | Position | Distance (bp) | Transcript            |
| ASS1                                  | 7        | 111           | BC141881              |
| ASS2                                  | 12       | 3             | NM_014823<br>AB002342 |

Figure 3.5: Features relative to alternative splicing events are summarized in the report table that can be displayed by clicking on the ‘Report’ button of the main toolbar (see Figure 3.3). For each type of alternative splicing event, the exon concerned and the number of transcripts having this alternative splicing event are displayed. Clicking on a given alternative splicing event displays further information about this event. Two examples of transcription end and exon skipping events tables are shown above. The ‘Transcription Termination & last Exons’ link shows polyadenylation sites. For each polyadenylation site, its exonic position, gene and chromosomal coordinates are shown. Moreover information about the signal pattern, the accession number and the type of sequence (cDNA/Est) of the transcript used to define the polyadenylation site are displayed. Finally, the presence of a polyA tail is tested and notified when detected in the sequence. Lastly, the ‘Exon Skipping’ table shows information about skipped exons by displaying their position and the transcripts that have been used to perform this annotation.



## FasterDB exon-intron table for human WNK1

| Exon-Intron |        |                  |                         |        |                          |                          |
|-------------|--------|------------------|-------------------------|--------|--------------------------|--------------------------|
| Position    | Type   | Gene coordinates | Chromosomal coordinates | Length | Sequence                 | Features                 |
| 1           | Exon   | 1 - 1402         | 862089 - 863490         | 1402   | <a href="#">sequence</a> | <a href="#">download</a> |
| 1           | Intron | 1403 - 60719     | 863491 - 922807         | 59317  | <a href="#">sequence</a> | -                        |
| 2           | Exon   | 60720 - 60892    | 922808 - 922980         | 173    | <a href="#">sequence</a> | <a href="#">download</a> |
| 2           | Intron | 60893 - 74119    | 922981 - 936207         | 13227  | <a href="#">sequence</a> | -                        |
| 3           | Exon   | 74120 - 74340    | 936208 - 936428         | 221    | <a href="#">sequence</a> | <a href="#">download</a> |
| 3           | Intron | 74341 - 77080    | 936429 - 939168         | 2740   | <a href="#">sequence</a> | -                        |
| 4           | Exon   | 77081 - 77238    | 939169 - 939326         | 158    | <a href="#">sequence</a> | <a href="#">download</a> |
| 4           | Intron | 77239 - 104238   | 939327 - 966326         | 27000  | <a href="#">sequence</a> | -                        |
| 5           | Exon   | 104239 - 104327  | 966327 - 966415         | 89     | <a href="#">sequence</a> | <a href="#">download</a> |
| 5           | Intron | 104328 - 106322  | 966416 - 968410         | 1995   | <a href="#">sequence</a> | -                        |
| 6           | Exon   | 106323 - 106542  | 968411 - 968630         | 220    | <a href="#">sequence</a> | <a href="#">download</a> |
| 6           | Intron | 106543 - 108090  | 968631 - 970178         | 1548   | <a href="#">sequence</a> | -                        |
| 7           | Exon   | 108091 - 108421  | 970179 - 970509         | 331    | <a href="#">sequence</a> | <a href="#">download</a> |
| 7           | Intron | 108422 - 109160  | 970510 - 971248         | 739    | <a href="#">sequence</a> | -                        |
| 8           | Exon   | 109161 - 109348  | 971249 - 971436         | 188    | <a href="#">sequence</a> | <a href="#">download</a> |
| 8           | Intron | 109349 - 112187  | 971437 - 974275         | 2839   | <a href="#">sequence</a> | -                        |
| 9           | Exon   | 112188 - 112442  | 974276 - 974530         | 255    | <a href="#">sequence</a> | <a href="#">download</a> |

Figure 3.6: Next comes the summary table of the exon/intron structure of the gene that can be displayed by clicking on the ‘Exon-Intron’ button of the main toolbar (see Figure 3.3). For each element, coordinates on the chromosome and on the gene are displayed as well as the element length. Clicking on ‘sequence’ displays the nucleotidic sequence of the element. For exons only, clicking on the ‘download’ link, in the ‘features’ column, produces a file containing further information about the exon of interest.

## FasterDB splice site strength table for human WNK1

| Splice site strength |               |      |          |             |                         |
|----------------------|---------------|------|----------|-------------|-------------------------|
| Identifier           | Site          | Exon | Strength | Alternative | Sequence                |
| S1                   | 5' (donor)    | 1    | 9.65     | no          | CAGgtaaag               |
| S2                   | 5' (donor)    | 1    | -19.55   | yes         | GCAgagcag               |
| S3                   | 5' (donor)    | 2    | 10.74    | no          | AACgtaagt               |
| S4                   | 3' (acceptor) | 2    | 9.34     | no          | gttttggtttttgatttagGAT  |
| S5                   | 5' (donor)    | 3    | 7.76     | no          | TAGgtatgt               |
| S6                   | 3' (acceptor) | 3    | 9.33     | no          | gtatacttgcttttctagGTA   |
| S7                   | 5' (donor)    | 4    | 8.46     | no          | AGTgtaagt               |
| S8                   | 3' (acceptor) | 4    | 7.73     | no          | aatcgctcttttaatttaagGTA |
| S9                   | 5' (donor)    | 5    | 11       | no          | AAGgtaagt               |
| S10                  | 3' (acceptor) | 5    | 8.5      | no          | tttctgttatggtttcagGGG   |
| S11                  | 5' (donor)    | 6    | 6.41     | no          | ATGgtaaat               |
| S12                  | 3' (acceptor) | 6    | 5.68     | no          | ctttccctctgtttggaagATA  |
| S13                  | 5' (donor)    | 7    | 3.41     | no          | TATgtacgt               |
| S14                  | 3' (acceptor) | 7    | 11.24    | no          | tttaccctttattctgtagGTA  |
| S15                  | 3' (acceptor) | 7    | -8.49    | yes         | agcggcagttggtacggagGAG  |
| S16                  | 5' (donor)    | 8    | 10.36    | no          | GTGgtaagt               |
| S17                  | 3' (acceptor) | 8    | 7.51     | no          | gcgattcatttttcttcagCTG  |
| S18                  | 5' (donor)    | 9    | 5.19     | no          | ACTgtatgt               |

Figure 3.7: The splice site strength table can be accessed by clicking on the ‘Splice site strength’ button of the main toolbar (see Figure 3.3). For each splice site, its type (donor or acceptor), its strength according to the MaxEntScan method and whether the site is alternative or not are indicated. Furthermore, the sequence (9 and 23 nucleotides for donor and acceptor sites respectively) is shown in upper case for the exonic part and in lower case for the intronic part.

## FasterDB 5'UTR and 3'UTR tables for human WNK1

|                                          | 5' untranslated regions                       |          |
|------------------------------------------|-----------------------------------------------|----------|
|                                          | UTR 1                                         | UTR 2    |
| Supporting GenBank accession identifiers | NM_018979<br>BC021121<br>BC071959<br>BC094862 | BC141881 |
| Length                                   | 643                                           | 701      |
| Number of ATGs in frame                  | 0                                             | 0        |
| Total number of ATGs                     | 4                                             | 5        |
| Number of GTGs in frame                  | 6                                             | 0        |
| Total number of GTGs                     | 15                                            | 12       |
| Number of CTGs in frame                  | 5                                             | 4        |
| Total number of CTGs                     | 13                                            | 9        |
| Number of micro ORFs in frame            | 0                                             | 0        |
| Total number of micro ORFs               | 2                                             | 3        |
| GC percentage                            | 77                                            | 50       |
| Number of pyrimidine tracks              | 6                                             | 3        |

  

|                                          | 3' untranslated regions          |                       |
|------------------------------------------|----------------------------------|-----------------------|
|                                          | UTR 1                            | UTR 2                 |
| Supporting GenBank accession identifiers | BC021121<br>BC071959<br>BC094862 | NM_018979<br>BC013629 |
| Length                                   | 206                              | 2660                  |
| Number of ATGs in frame                  | 0                                | 15                    |
| Total number of ATGs                     | 1                                | 44                    |
| Number of GTGs in frame                  | 1                                | 15                    |
| Total number of GTGs                     | 4                                | 52                    |
| Number of CTGs in frame                  | 1                                | 17                    |
| Total number of CTGs                     | 4                                | 44                    |
| GC percentage                            | 33                               | 39                    |
| Number of pyrimidine tracks              | 1                                | 22                    |

Figure 3.8: This table can be displayed by clicking on the '5'UTR' and '3'UTR' buttons of the main toolbar (see Figure 3.3). Several information about each of the 5 untranslated regions are provided. For each UTR, the subset of transcripts having this UTR is displayed as well as the number of ATG, GTG and CTG motifs found either globally in the UTR sequence or in frame. The length and the GC content are also computed for each UTR. Finally, the number of pyrimidine tracks as well as the number of microORFs is displayed.

## FasterDB miRNA table for human WNK1

| miRNAs     |                                 |                  |                                 |                      |
|------------|---------------------------------|------------------|---------------------------------|----------------------|
| Identifier | Name                            | Gene coordinates | Chromosomal coordinates         | Prediction algorithm |
| Group 1    |                                 |                  |                                 |                      |
| M1         | <a href="#">hsa-miR-613</a>     | 74370 - 74388    | <a href="#">936458 - 936476</a> | miranda              |
| M2         | <a href="#">hsa-miR-206</a>     | 74370 - 74388    | <a href="#">936458 - 936476</a> | miranda              |
| M3         | <a href="#">hsa-miR-1</a>       | 74370 - 74388    | <a href="#">936458 - 936476</a> | miranda              |
| M4         | <a href="#">hsa-miR-146b-5p</a> | 74475 - 74498    | <a href="#">936563 - 936586</a> | miranda              |
| Group 2    |                                 |                  |                                 |                      |
| M1         | <a href="#">hsa-miR-19b</a>     | 116213 - 116230  | <a href="#">978301 - 978318</a> | miranda              |
| M2         | <a href="#">hsa-miR-19a</a>     | 116213 - 116230  | <a href="#">978301 - 978318</a> | miranda              |
| M3         | <a href="#">hsa-miR-448</a>     | 116328 - 116348  | <a href="#">978416 - 978436</a> | miranda              |
| M4         | <a href="#">hsa-miR-136</a>     | 116344 - 116367  | <a href="#">978432 - 978455</a> | miranda              |
| M5         | <a href="#">hsa-miR-23a</a>     | 116346 - 116366  | <a href="#">978434 - 978454</a> | miranda              |
| M6         | <a href="#">hsa-miR-23b</a>     | 116346 - 116366  | <a href="#">978434 - 978454</a> | miranda              |
| M7         | <a href="#">hsa-miR-153</a>     | 116439 - 116463  | <a href="#">978527 - 978551</a> | miranda              |
| M8         | <a href="#">hsa-miR-217</a>     | 116442 - 116466  | <a href="#">978530 - 978554</a> | miranda              |
| M9         | <a href="#">hsa-miR-374a</a>    | 116631 - 116653  | <a href="#">978719 - 978741</a> | miranda              |
| M10        | <a href="#">hsa-miR-374b</a>    | 116632 - 116653  | <a href="#">978720 - 978741</a> | miranda              |

Figure 3.9: This table summarizes information about micro RNA binding sites found in the gene UTR sequence and is displayed by clicking on the ‘miRNA’ button of the main toolbar (see Figure 3.3). For each miRNA, its identifier, gene and chromosomal coordinates, together with the algorithm that predicted this miRNA binding site (among Miranda, pita, targetscore) are indicated. When a polyadenylation site is present, a blue bar is displayed between the miRNA binding sites.

## FasterDB protein prediction table for human WNK1

| Protein prediction |                          |
|--------------------|--------------------------|
| Transcript name    | Sequence                 |
| AF061944           | <a href="#">sequence</a> |
| NM_018979          | <a href="#">sequence</a> |
| NM_213655          | <a href="#">sequence</a> |
| NM_001184985       | <a href="#">sequence</a> |
| NM_014823          | <a href="#">sequence</a> |
| BC021121           | <a href="#">sequence</a> |
| BC071959           | <a href="#">sequence</a> |
| BC094862           | <a href="#">sequence</a> |
| AJ296290           | <a href="#">sequence</a> |
| BC141881           | <a href="#">sequence</a> |
| AB002342           | <a href="#">sequence</a> |
| DQ925669           | <a href="#">sequence</a> |
| BC013629           | <a href="#">sequence</a> |

Figure 3.10: The protein predictions are available upon clicking on the ‘Protein prediction’ button of the main toolbar (see Figure 3.3). This table contains the protein predictions for the transcripts associated to the gene of interest when these transcripts are known or predicted protein coding transcripts. The fasta sequences of these proteins can be accessed by using the ‘sequence’ link in the table.

## FasterDB conserved exon table for human WNK1

| Conserved exons       |                |                |
|-----------------------|----------------|----------------|
| Gene identifier mouse | Position human | Position mouse |
| 4851                  | 1              | 1              |
| 4851                  | 2              | 2              |
| 4851                  | 3              | 3              |
| 4851                  | 4              | 4              |
| 4851                  | 5              | 7              |
| 4851                  | 6              | 8              |
| 4851                  | 7              | 9              |
| 4851                  | 8              | 10             |
| 4851                  | 9              | 11             |
| 4851                  | 10             | 12             |
| 4851                  | 11             | 13             |
| 4851                  | 12             | 14             |
| 4851                  | 13             | 15             |
| 4851                  | 14             | 16             |
| 4851                  | 15             | 17             |

Figure 3.11: This table can be displayed by using the ‘Conservation’ button of the main toolbar (see Figure 3.3). First, the mouse orthologous of the human gene is indicated (or vice-versa). Then, for each human exon, its orthologous mouse exon, if it exists, is identified.

## FasterDB sequence tool

Get sequences

Before
50
Exon start
Download

```

>Exon1
GGCCTCGGGGAAGGGGGGCCGCTCCTCAGGCGCCGAGGCTCCGAGGCT
>Exon2
TTGGTGTTCCTATCATTTTAAACCACATTCTGTTTTGGTTTTGATTTAG
>Exon3
AACAACTCCTATCATTGATAACTTGTTTGGTATACCTTGTCTTTCTAG
>Exon4
CGTCTGAAGCTTCTGCTCGCATTGAGTCTGAATCGTTCTTTAATTTAAG
>Exon5
AAGTTCAAAGGCCCTGCTTTTATTAATGTATTTCTGTTTATGGTTTTAG
>Exon6
AACTAATGGTGTTCCTTTTGTTCCTTTTCCCTCTGTTTGAAG
>Exon7
GTTGTTTCTTTCAATATACTACTGCTTAATTTACCTTTTATTCGTAG
>Exon8
TGATTTGTCTTTCTCTCTCTTTTTTTGGCGATTCTTTTCCTTCAG
>Exon9
TTGTTTTACAGTACTGTGTTTTTCATGTGTGTGTTTGTGTTGAG
>Exon10
AATTTACATATGAATGTATGAATTACTTGTCTTATTCATGTTGATACAG
>Exon11
CACTTACTTTAGGCCTTCTCTAATTTGTTGTGTTCACTTCTTCCTTCAG
>Exon12
ATGCTGTTATTGATTTGAAATAAACTGAATCATTGATTTTATTCTTAG

```

Figure 3.12: Intronic or exonic sequences can be downloaded by clicking on the ‘Exon-Intron’ button of the main toolbar or by clicking on any exon or intron on the graphical representation of the gene. Alternatively, the ‘Sequences’ button of the main toolbar allows the retrieval of the flanking genetic sequences of all exons or introns of the displayed gene. Users have to select the length of the requested sequences. This functionality is useful for instance, to retrieve the exon 3’ splice sites, by retrieving, for all exons, the 50 nucleotides upstream as shown above.

## FasterDB expression table for human WNK1

| Expression  |                            |                            |                            |
|------------------------------------------------------------------------------------------------|----------------------------|----------------------------|----------------------------|
| Exon position                                                                                  | Tissues                    | Cell lines                 | Cancer cell lines          |
| 1                                                                                              | <a href="#">Expression</a> | <a href="#">Expression</a> | <a href="#">Expression</a> |
| 2                                                                                              | <a href="#">Expression</a> | <a href="#">Expression</a> | <a href="#">Expression</a> |
| 3                                                                                              | <a href="#">Expression</a> | <a href="#">Expression</a> | <a href="#">Expression</a> |
| 4                                                                                              | <a href="#">Expression</a> | <a href="#">Expression</a> | <a href="#">Expression</a> |
| 5                                                                                              | <a href="#">Expression</a> | <a href="#">Expression</a> | <a href="#">Expression</a> |
| 6                                                                                              | <a href="#">Expression</a> | <a href="#">Expression</a> | <a href="#">Expression</a> |
| 7                                                                                              | <a href="#">Expression</a> | <a href="#">Expression</a> | <a href="#">Expression</a> |
| 8                                                                                              | <a href="#">Expression</a> | <a href="#">Expression</a> | <a href="#">Expression</a> |
| 9                                                                                              | <a href="#">Expression</a> | <a href="#">Expression</a> | <a href="#">Expression</a> |
| 10                                                                                             | <a href="#">Expression</a> | <a href="#">Expression</a> | <a href="#">Expression</a> |
| 11                                                                                             | <a href="#">Expression</a> | <a href="#">Expression</a> | <a href="#">Expression</a> |
| 12                                                                                             | <a href="#">Expression</a> | <a href="#">Expression</a> | <a href="#">Expression</a> |
| 13                                                                                             | <a href="#">Expression</a> | <a href="#">Expression</a> | <a href="#">Expression</a> |
| 14                                                                                             | <a href="#">Expression</a> | <a href="#">Expression</a> | <a href="#">Expression</a> |
| 15                                                                                             | <a href="#">Expression</a> | <a href="#">Expression</a> | <a href="#">Expression</a> |

| Experiments | Expressed | Gene expression level | NI    | Global SI | Local SI | p-value |
|-------------|-----------|-----------------------|-------|-----------|----------|---------|
| Heart       | Yes       | 415                   | 1.67  | 3.26      | 3.08     | 0.0000  |
| Thyroid     | Yes       | 244                   | -1.10 | 1.79      | 1.50     | 0.0000  |
| Muscle      | Yes       | 262                   | -1.03 | 1.91      | 1.39     | 0.0004  |
| Testis      | Yes       | 215                   | -1.11 | 1.76      | 1.21     | 0.0007  |
| Cerebellum  | Yes       | 188                   | -1.69 | 1.16      | -1.33    | 0.0000  |
| Pancreas    | No        | 120                   | -3.33 | -1.96     | -1.39    | 0.0040  |
| Kidney      | Yes       | 457                   | -1.75 | 1.10      | -1.69    | 0.0000  |
| Prostate    | Yes       | 174                   | -2.22 | -1.30     | -2.04    | 0.0000  |
| Liver       | Yes       | 189                   | -2.70 | -1.56     | -2.22    | 0.0000  |
| Breast      | Yes       | 207                   | -3.45 | -2.04     | -2.27    | 0.0000  |
| Spleen      | Yes       | 204                   | -4.00 | -2.38     | -3.23    | 0.0000  |

Figure 3.13: The expression table contains links to the expression profile of the exons in tissues, in cell lines and in cancer cell lines (human only). It can be accessed by using the ‘Expression’ button of the main toolbar (see Figure 3.3). For each group (tissues/cell lines/cancer cell lines), the dedicated link redirects the user to the expression profile page that details the expression profile of the selected exon. For each tissue/cell line, the gene expression level is estimated through several indexes (see section 2.2). The table can be sorted by any column. Finally, the p-value of the student test based on the local SI values is displayed when available. Clicking on the name of the tissues/cell lines links out to Elexir where the entire gene profile can be investigated (see section 3.2).

## FasterDB splicing factor tool

| Splicing factors |            |           |                           |
|------------------|------------|-----------|---------------------------|
| Splicing factor  | Exon array | CLIP data | Exon position             |
| CELF1 (CUG-BP)   |            |           | 1 <input type="text"/> Go |
| DAZAP1           |            |           | 1 <input type="text"/> Go |
| ELAVL1 (HuR)     | Yes        | Yes       | 1 <input type="text"/> Go |
| ESRP1/2 (ESRP)   | Yes        |           | 1 <input type="text"/> Go |
| FUS              |            | Yes       | 1 <input type="text"/> Go |
| HNRNPA1          |            | Yes       | 1 <input type="text"/> Go |
| HNRNPA2B1        |            | Yes       | 1 <input type="text"/> Go |
| HNRNPAB          |            |           | 1 <input type="text"/> Go |
| HNRNPC           |            | Yes       | 1 <input type="text"/> Go |
| HNRNPF/HNRNPH1   | Yes        | Yes       | 1 <input type="text"/> Go |
| HNRNPL           | Yes        |           | 1 <input type="text"/> Go |
| HNRNPL_2         |            |           | 1 <input type="text"/> Go |
| HNRNPM           |            | Yes       | 1 <input type="text"/> Go |
| HNRNPU           |            | Yes       | 1 <input type="text"/> Go |
| MBNL             |            |           | 1 <input type="text"/> Go |
| NOVA1            |            |           | 1 <input type="text"/> Go |
| PTBP1/2 (PTB)    | Yes        | Yes       | 1 <input type="text"/> Go |
| QKI              |            |           | 1 <input type="text"/> Go |
| RBFOX2 (FOX2)    |            | Yes       | 1 <input type="text"/> Go |
| RBM4             | Yes        |           | 1 <input type="text"/> Go |
| SFRS3 (SRP20)    |            |           | 1 <input type="text"/> Go |
| SFRS6 (SRP55)    |            |           | 1 <input type="text"/> Go |
| SFRS7 (9G8)      |            |           | 1 <input type="text"/> Go |
| SRSF1 (SF2ASF)   |            |           | 1 <input type="text"/> Go |
| SRSF2 (SC35)     |            |           | 1 <input type="text"/> Go |
| SRSF5 (SRP40)    |            |           | 1 <input type="text"/> Go |
| TIA1/TIAL1       |            | Yes       | 1 <input type="text"/> Go |
| TRA2A            |            |           | 1 <input type="text"/> Go |
| TRA2B            |            |           | 1 <input type="text"/> Go |
| YBX1 (YB1)       |            |           | 1 <input type="text"/> Go |

Figure 3.14: The splicing factor tool, accessible through the ‘Splicing factor’ button of the main toolbar (see Figure 3.3), allows one to check for a selected exon and splicing factor whether there exist motifs corresponding to the splicing factors around the exon starts/ends, and whether experimental datasets (siRNA, CLIPseq) are available. See for instance above the example for the WNK1 gene. More details about this functionality are provided in section 3.3.

## 3.2 Elexir tutorial

Elexir is a web application which allows user to choose an experiment within a different set of stored exon array experiments. This interface has been developed in order to allow the end-user to browse and to easily query one or more gene expression between conditions with possible replicates for each condition. Different tested conditions can be chosen for each experiment. A

condition can be defined as a cell line, tissue or treatment. Paired or unpaired analysis can be done depending on samples relationship used for test and control conditions.

The page contains the structure of the queried gene, the same structure as in FasterDB using the same color code (see section 3.1). Below is the intensity report that is centered around a schematic graph of the gene with corresponding probes for each exon. The scheme represents both the exons in light blue and the introns in white (when intronic probes are displayed - see the control panel). Above and below the plots are bars, whose heights represent the normalized probe intensities (in log2 scale) respectively for the test and the control conditions. Above the scheme of the gene, the colors reflect the ratio between probe intensity in test and control conditions. Green or red colors mean that the probe intensity in the test condition is lower or higher, respectively, compared to the control condition. Black bars point to no difference between both conditions. Below the scheme of the gene, the colors indicate the quality of the probe. Dark grey probes are considered as not expressed (DABG p-value > 0.05), strikethrough bars represent probes that align multiple times on the genome (and that are therefore non specific), red enclosed bars indicate a too low GC content for the associated probes. This color code is also summarized in Figure 3.15.

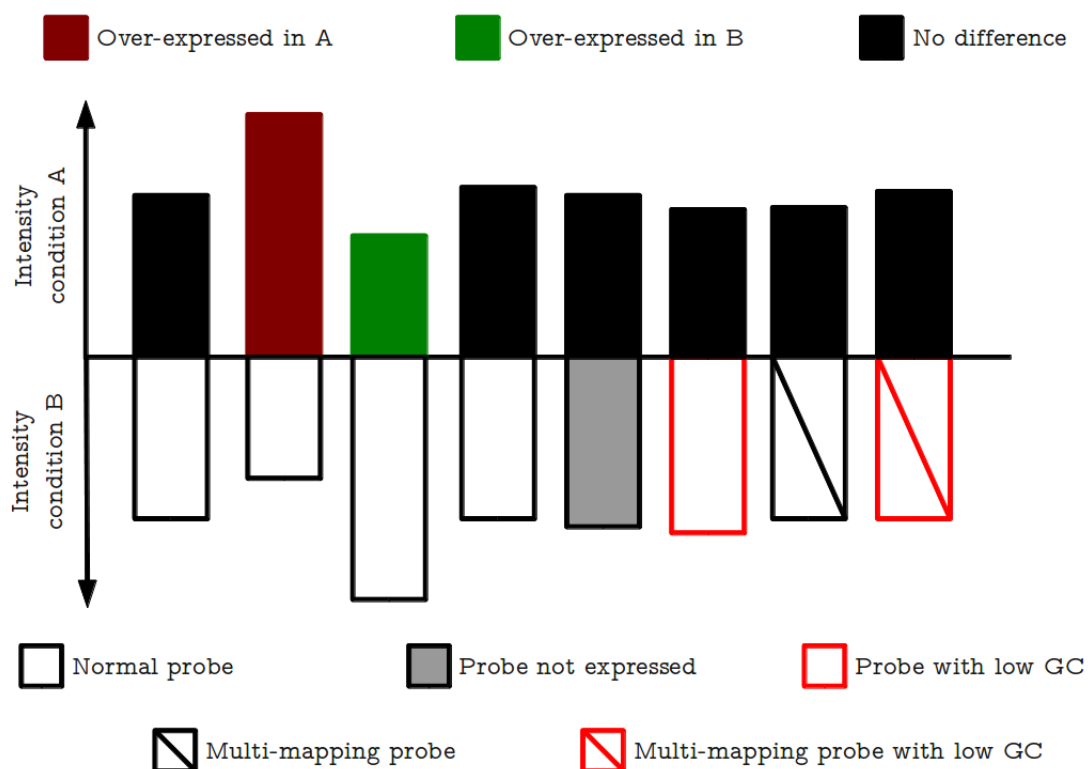

Figure 3.15: The Elexir color code

Information for each probe can be easily accessed either by a simple click on the bar or by the underlying descriptive table. In addition, a control panel is located on top to adapt the parameters and thus ease the visualization process.

# Elexir search engine

The screenshot displays the Elexir search engine interface. At the top, a tab labeled "Exon level expression: intensity report" is active. Below this, the "Select experiments :" section has a dropdown menu set to "Cell by cell analysis[Human]". A blue header bar contains the text: "Name: Cell by cell analysis ID: 3PY2PC Organism: Human Type: EXON Date: 2012-07-09 16:28:02". The "Find your Gene(s) :" section includes a text input field with "WNK1" and a yellow highlight box below it containing the text "WNK1 : WNK lysine deficient protein kinase 1". The "Select your Analysis :" section features three dropdown menus: "Condition Test" set to "HSMM", "Condition Control" set to "All", and "Type Analysis" set to "Unpaired". "Add" and "Remove" buttons are present next to the gene and analysis sections. A "GO!" button is located at the bottom center.

Figure 3.16: The home page of Elexir is the search page that can be used to access the gene page when all parameters have been inputted (see for instance the search corresponding to the human WNK1 gene above). On this search page, a user first needs to select the dataset to investigate (*e.g.*, human tissues, mouse cell lines), then the gene to display and the parameters of the analysis (which conditions are used as test, which conditions are used as control). Notice that several genes can be inputted one by one and the gene page will then contain the results for each gene.



# Elexir gene page for human WNK1

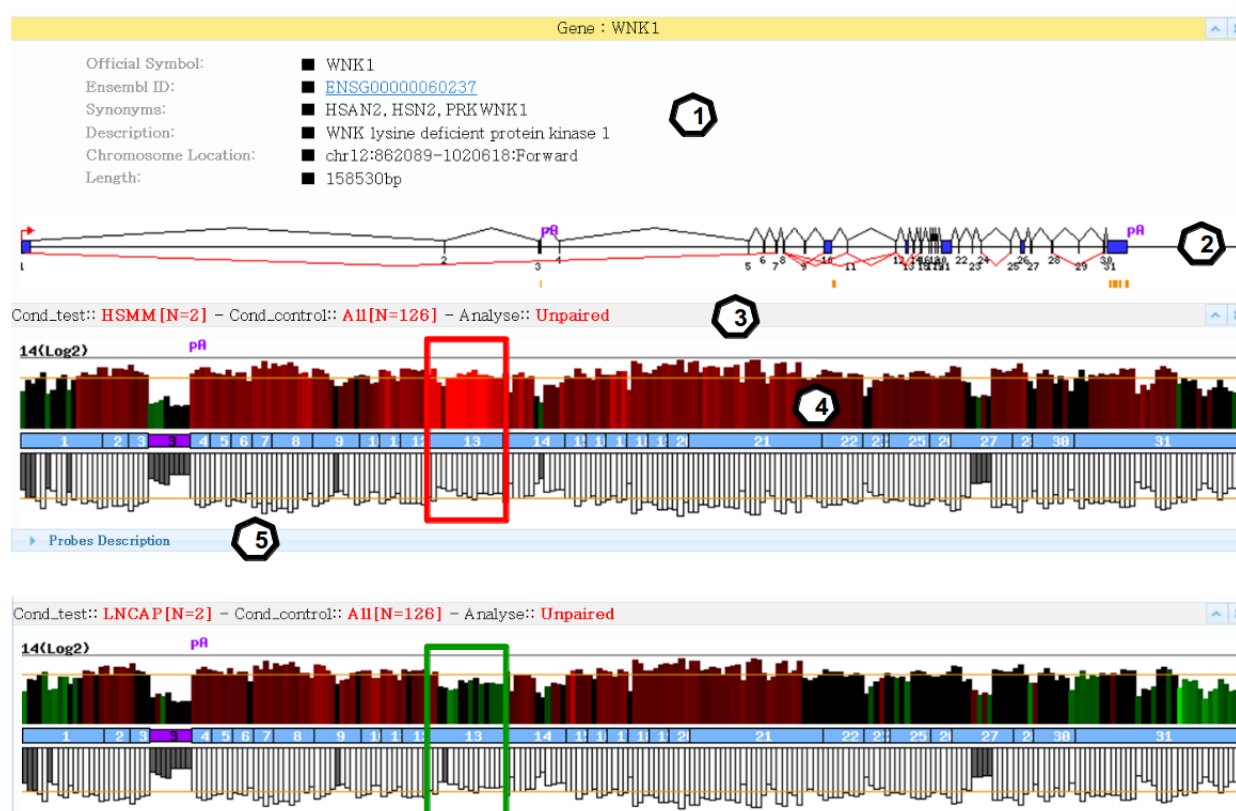

Figure 3.17: The WNK1 gene page in Elexir. First, information about the gene and its structure is depicted (same image as in FasterDB) (heptagons 1 and 2). Then, details of the analysis are summarized (heptagon 3) and the results are displayed per probe along the gene (heptagon 4). The height of each probe corresponds to its intensity level. Red probes indicate inclusion in test condition while green probes indicate its exclusion (inclusion in control condition). Black probes point no difference between both conditions. In addition, a description of the probes can be found below the results (heptagon 5). For an example, see Figure 3.17 that exhibits the WNK1 expression profile in two cell lines (HSMC and LNCAP) versus all the other cell lines.

## 3.3 Splicing factor tutorial

The motifs identified around splicing sites are displayed on a special page for a single exon. On this page, the exon is represented by a blue box and the flanking introns by solid black lines. Light yellow boxes indicate the positions where the motif associated to the splicing factor has been identified. Notice that the orthologous mouse exon is also displayed when available. Sequences of exon or introns (upstream and downstream the exon) can be displayed simply by clicking on exon or intron in the graphical presentation.

The siRNA datasets are visualized using Elexir (see section 3.2).

The CLIPseq datasets are represented by histograms covering the whole gene (whose FasterDB structure is also displayed) that indicate the number of reads that have been mapped to each chromosomal location. When several experiments exist, several histograms are displayed,

one for each experiment.

# Splicing factor: motif page

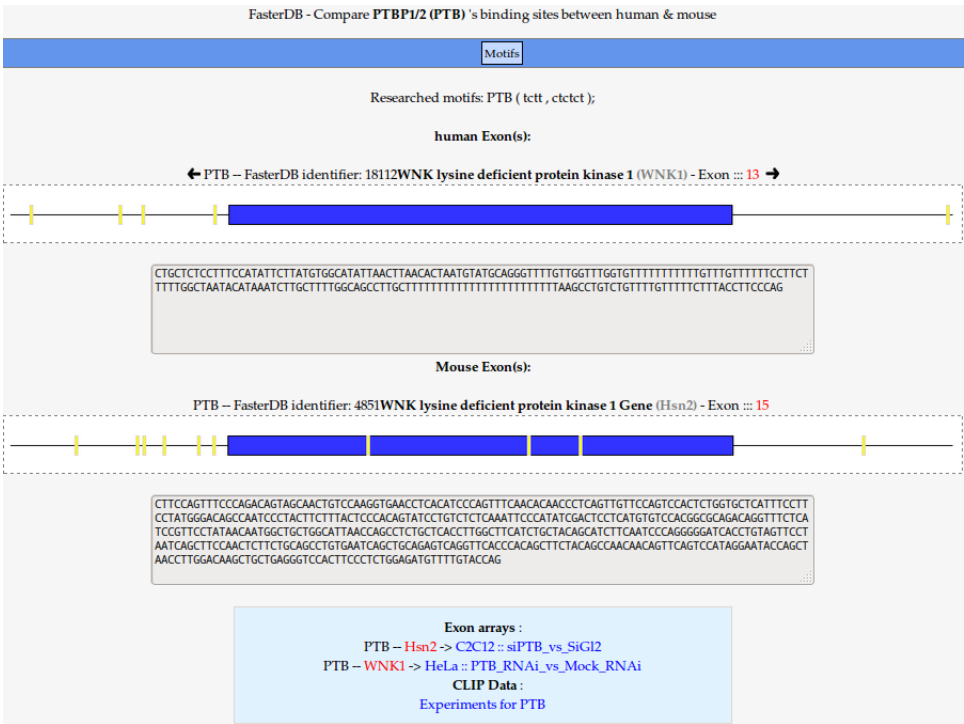

Figure 3.18: The motif page displays for a selected exon and motif, the motifs found in and around the exon (200 nucleotides in the bordering introns). It can be accessed from the main toolbar of the gene page (see Figure 3.3) through the ‘Splicing factor’ button). The example above shows the PTB motifs for exon 13 of the WNK1 gene and for its orthologous exon (exon 15 of the mouse WNK gene).

# Splicing factor: CLIPseq datasets

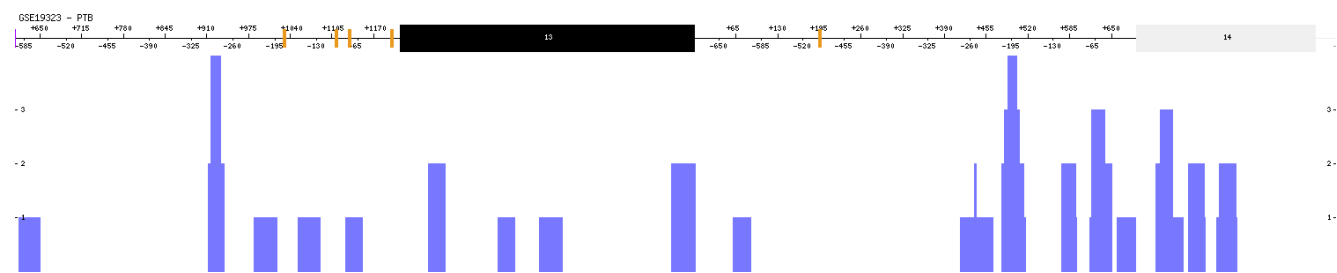

Figure 3.19: This page can be accessed from the links at the bottom of the motif page (see Figure 3.18). Reads from CLIPseq experiment corresponding to binding sites of a selected splicing factor are represented as a raw signal below exons schematic presentation. When available, multiple CLIPseq profiles are displayed one on top of another. The above example illustrates the data available for the exon 13 of WNK1 and the PTB splicing factor.
